# Supplementary material for: Exploring the chemistry of backbone amino(chloro)phosphanyl-substituted imidazole-2-thiones
Source: Royal Society of Chemistry journal article supplement (doi:10.1039/c7dt01859b), 2017-01-01

## Supplimentary Material

### **Exploring the chemistry of backbone amino(chloro)phosphanyl-substituted imidazole-2-thiones**

Abhishek Koner<sup>a</sup>, Spencer C. Serin<sup>b</sup>, Gregor Schnakenburg<sup>a</sup>, Brian O. Patrick,<sup>b</sup> Derek P. Gates<sup>b,\*</sup> and Rainer Streubel<sup>a,\*</sup>

<sup>a</sup> Institut für Anorganische Chemie, Rheinische Friedrich-Wilhelms-Universität Bonn, Gerhard-Domagk-Straße 1, D-53121 Bonn, Germany.

<sup>b</sup> Department of Chemistry, University of British Columbia, 2036 Main Mall, Vancouver, British Columbia, V6T 1Z1, Canada.

\* Corresponding authors. Email: r.streubel@uni-bonn.de; dgates@chem.ubc.ca

#### Contents

|                                         |    |
|-----------------------------------------|----|
| 1 Spectra for Compound <b>2a</b> .....  | 2  |
| 2 Spectra for Compound <b>2b</b> .....  | 4  |
| 3 Spectra for Compound <b>2c</b> .....  | 6  |
| 4 Spectra for Compound <b>3a</b> .....  | 8  |
| 5 Spectra for Compound <b>3b</b> .....  | 10 |
| 6 Spectra for Compound <b>3c</b> .....  | 12 |
| 7 Spectra for Compound <b>4a</b> .....  | 14 |
| 8 Spectra for Compound <b>4b</b> .....  | 16 |
| 9 Spectra for Compound <b>4c</b> .....  | 18 |
| 10 Spectra for Compound <b>5</b> .....  | 20 |
| 11 Spectra for Compound <b>6</b> .....  | 22 |
| 12 Spectra for Compound <b>7a</b> ..... | 24 |
| 13 Spectra for Compound <b>7b</b> ..... | 26 |
| 14 Spectra for Compound <b>8</b> .....  | 28 |
| 15 Spectra for Compound <b>11</b> ..... | 30 |

# 1 Spectra for Compound 2a

Figure S1:  $^1\text{H}$  NMR spectrum of **2a** in  $\text{CDCl}_3$  (300.1 MHz, 25 °C)

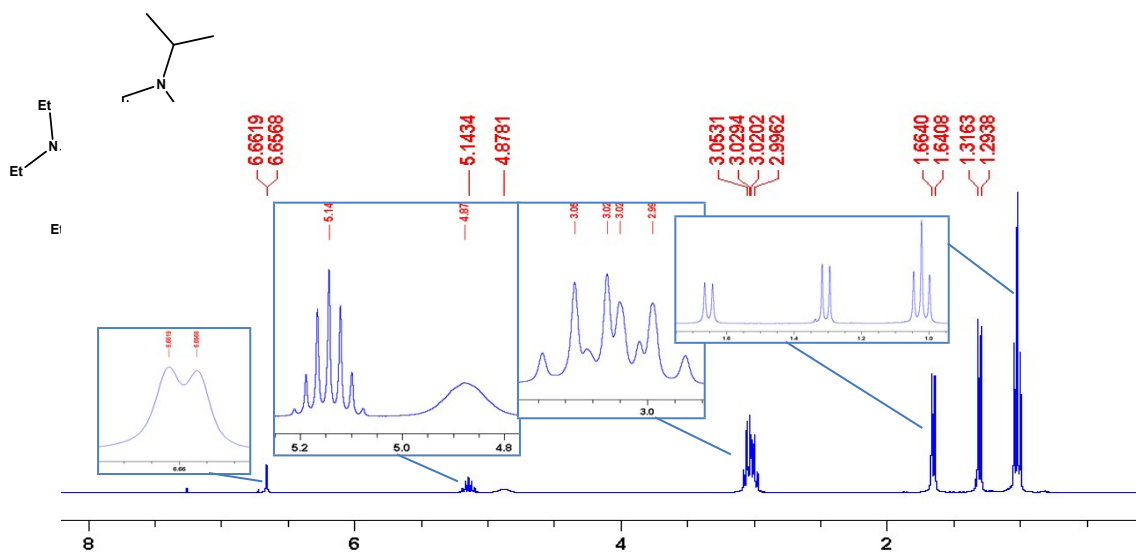

Figure S2:  $^{13}\text{C}$   $\{^1\text{H}\}$  NMR spectrum of **2a** in  $\text{CDCl}_3$  (75.5 MHz, 25 °C)

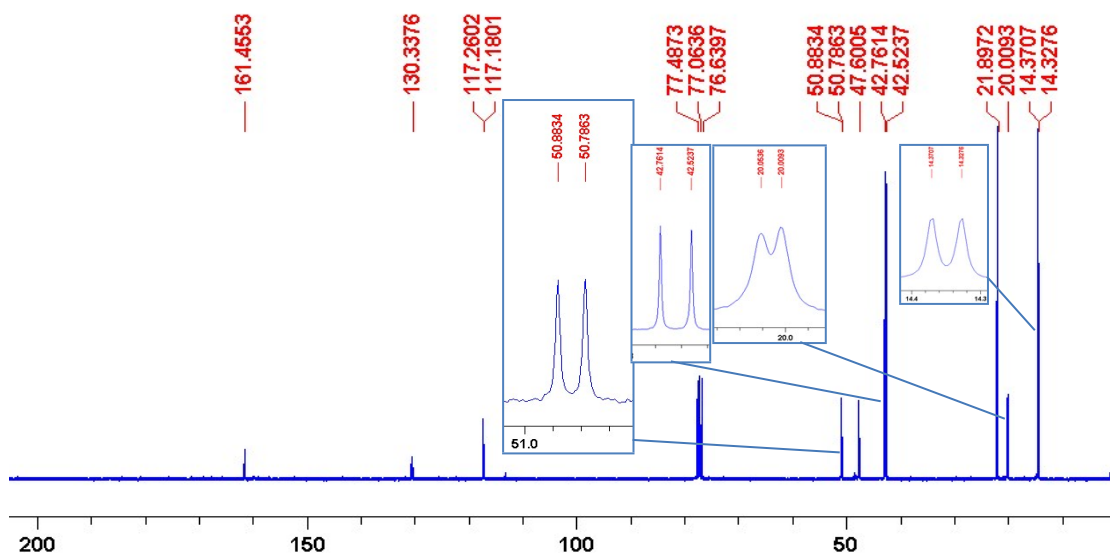

Figure S3:  $^{31}\text{P}$  NMR spectrum of **2a** in  $\text{CDCl}_3$  (121.5 MHz, 25 °C)

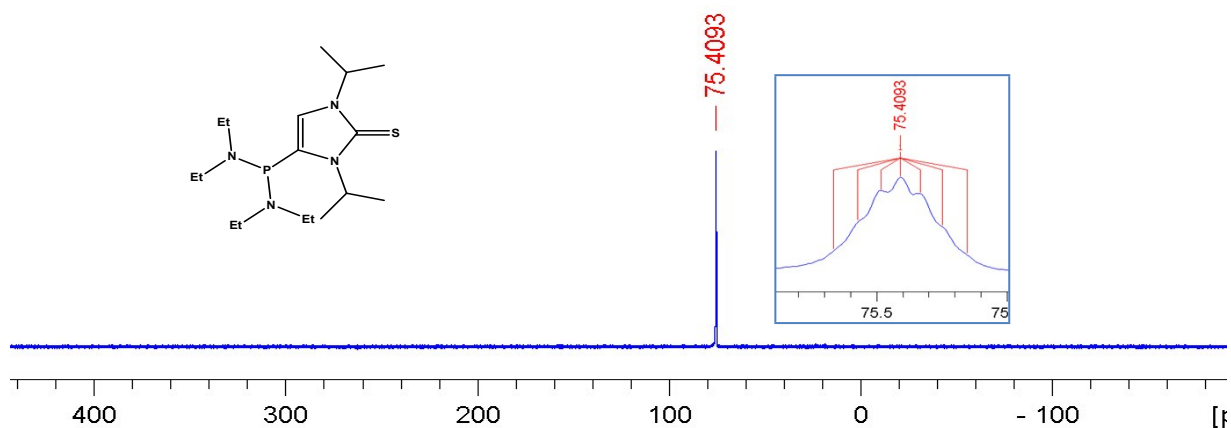

Figure S4: EI-MS spectrum of **2a**.

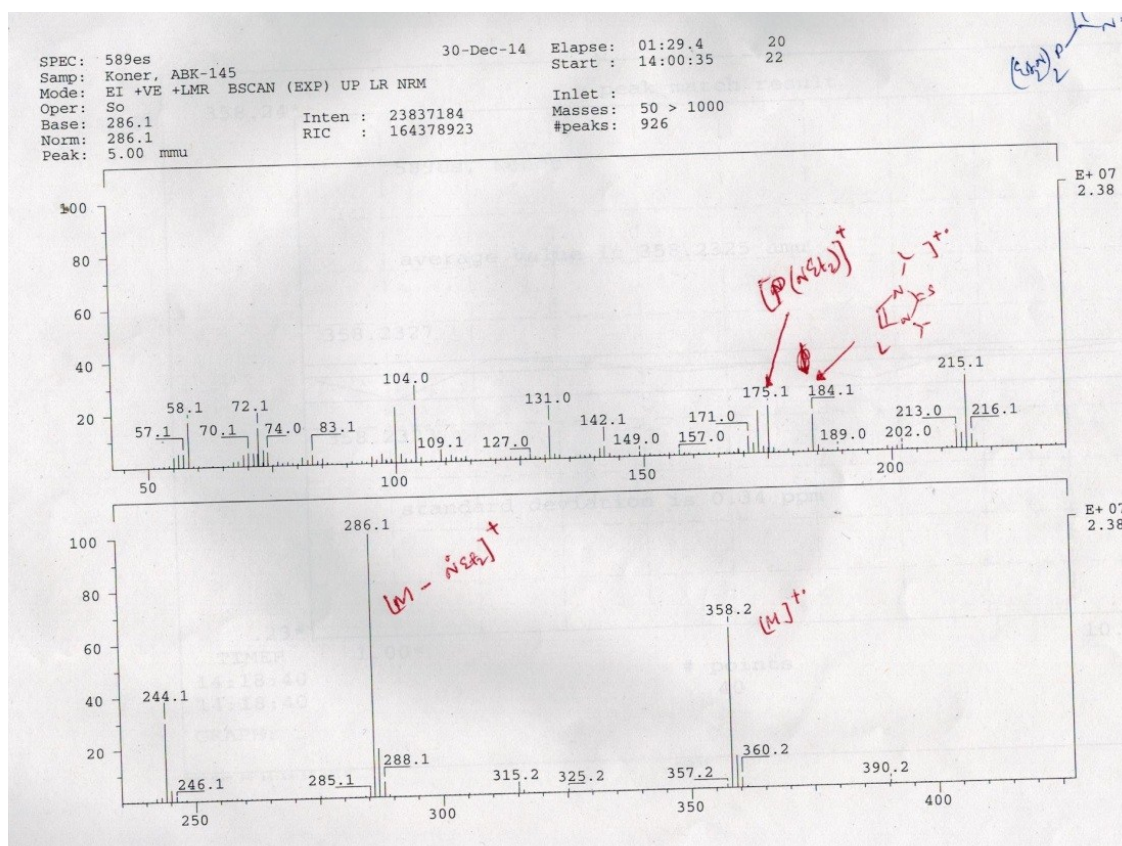

## 2 Spectra for Compound **2b**

Figure S5:  $^1\text{H}$  NMR spectrum of **2b** in  $\text{CDCl}_3$  (121.5 MHz, 25 °C)

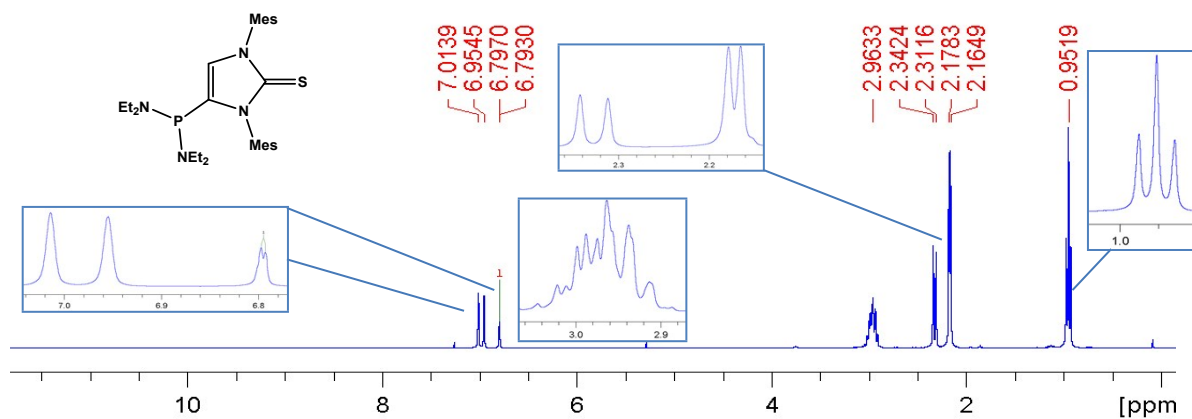

Figure S6:  $^{13}\text{C}$   $\{^1\text{H}\}$  NMR spectrum of **2b** in  $\text{CDCl}_3$  (121.5 MHz, 25 °C)

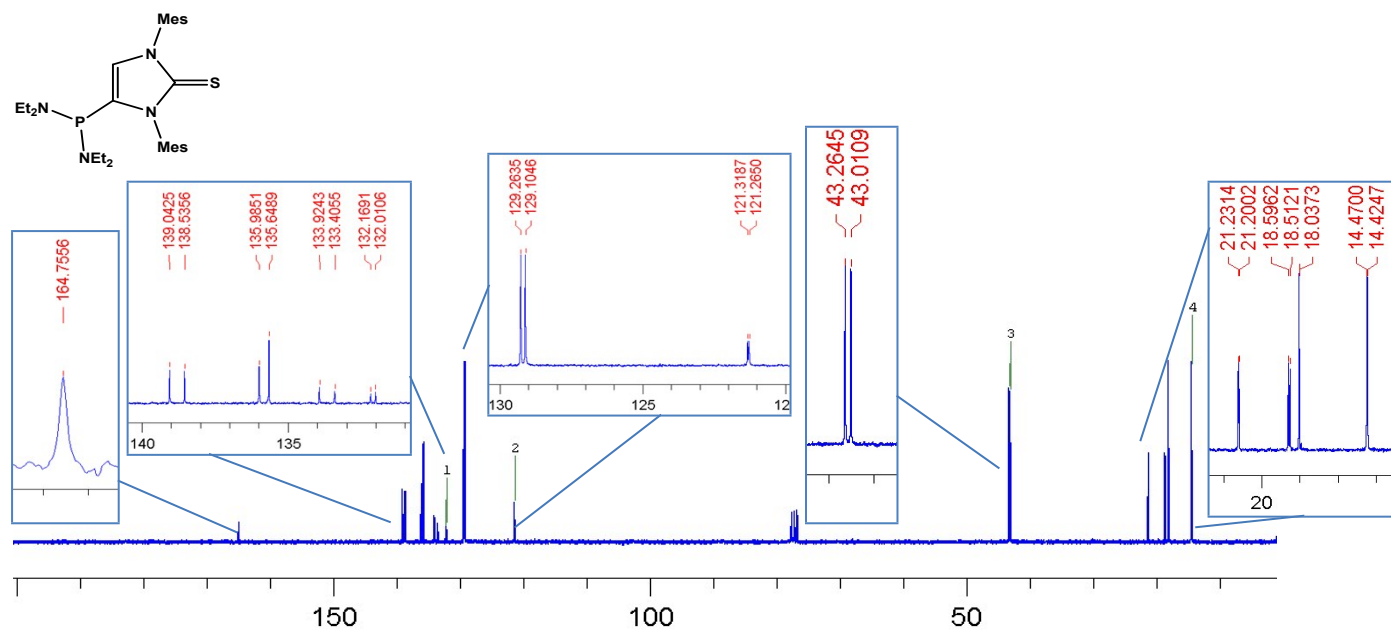

Figure S7:  $^{31}\text{P}$  NMR spectrum of **2b** in  $\text{CDCl}_3$  (121.5 MHz, 25 °C)

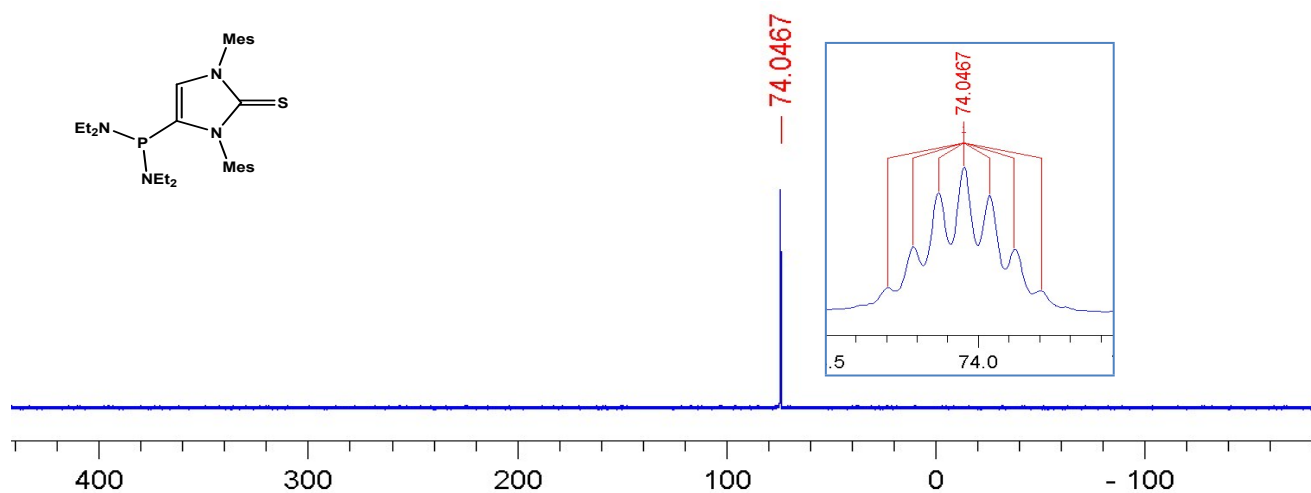

Figure S8: EI-MS spectrum of **2b**.

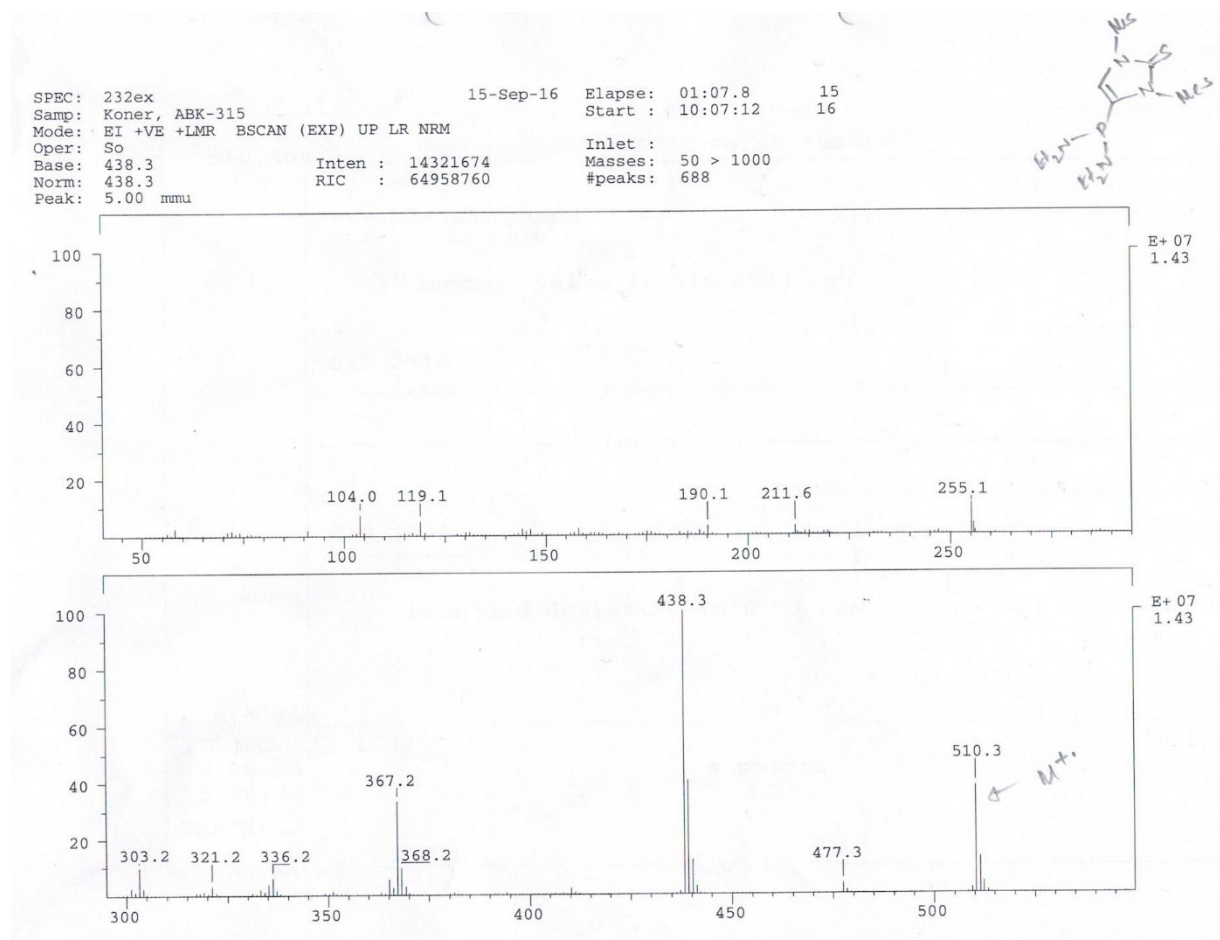

### 3 Spectra for Compound **2c**.

Figure S9:  $^1\text{H}$  NMR spectrum of **2c** in  $\text{CDCl}_3$  (300.1 MHz, 25 °C)

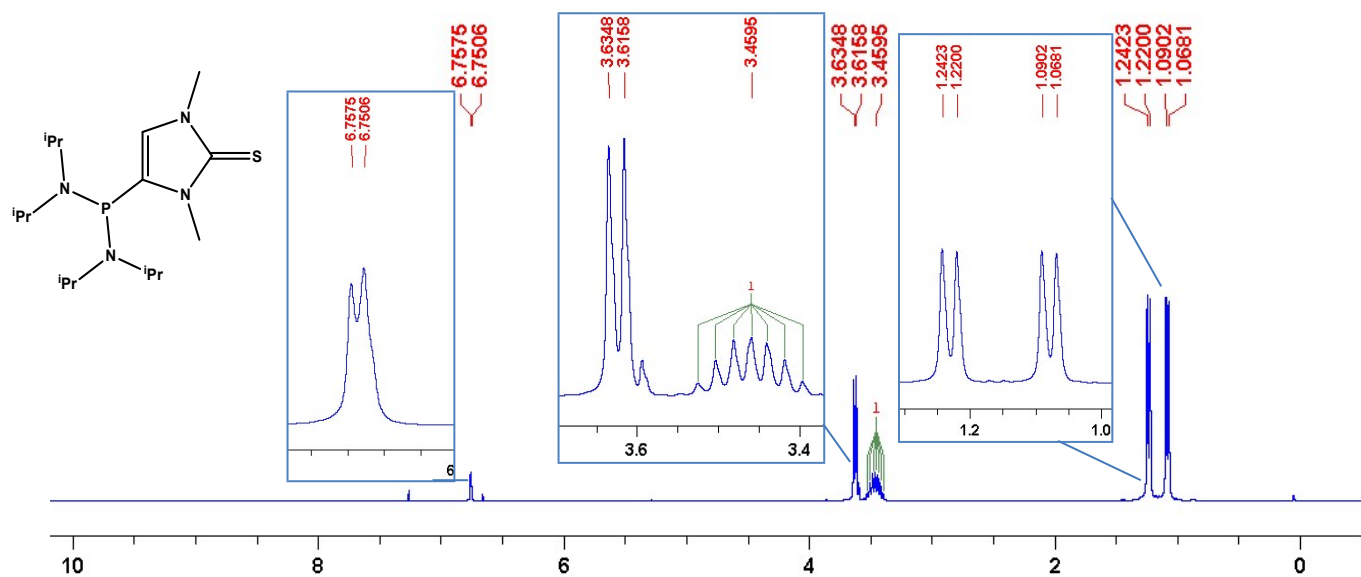

Figure S10:  $^{13}\text{C}$   $\{^1\text{H}\}$  NMR spectrum of **2c** in  $\text{CDCl}_3$  (75.5 MHz, 25 °C)

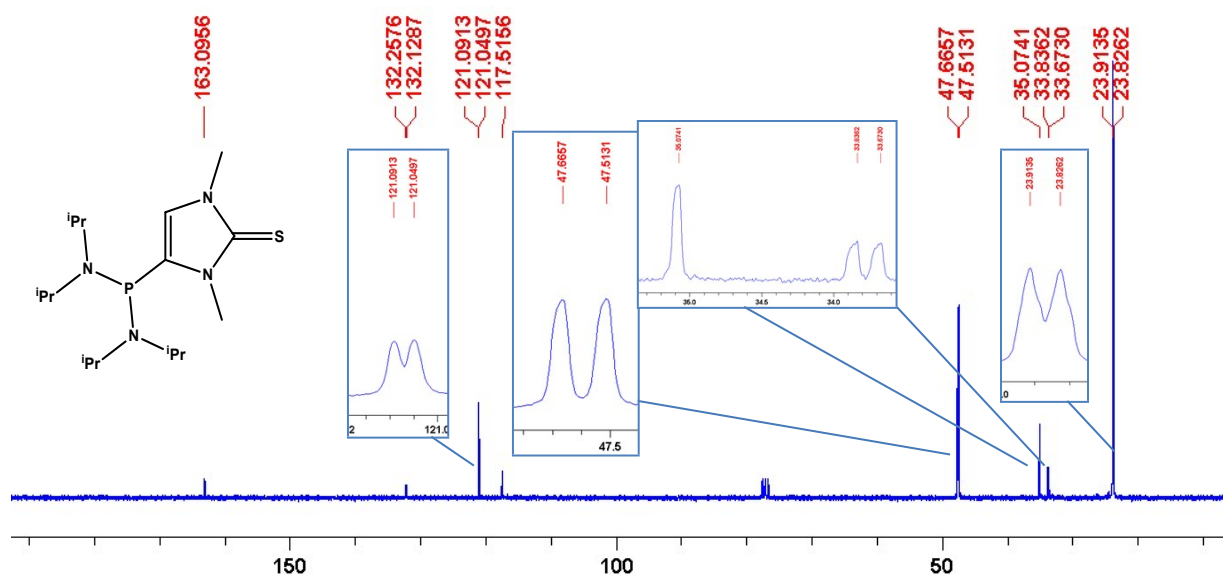



Figure S11:  $^{31}\text{P}$  NMR spectrum of **2c** in  $\text{CDCl}_3$  (121.5 MHz, 25 °C)

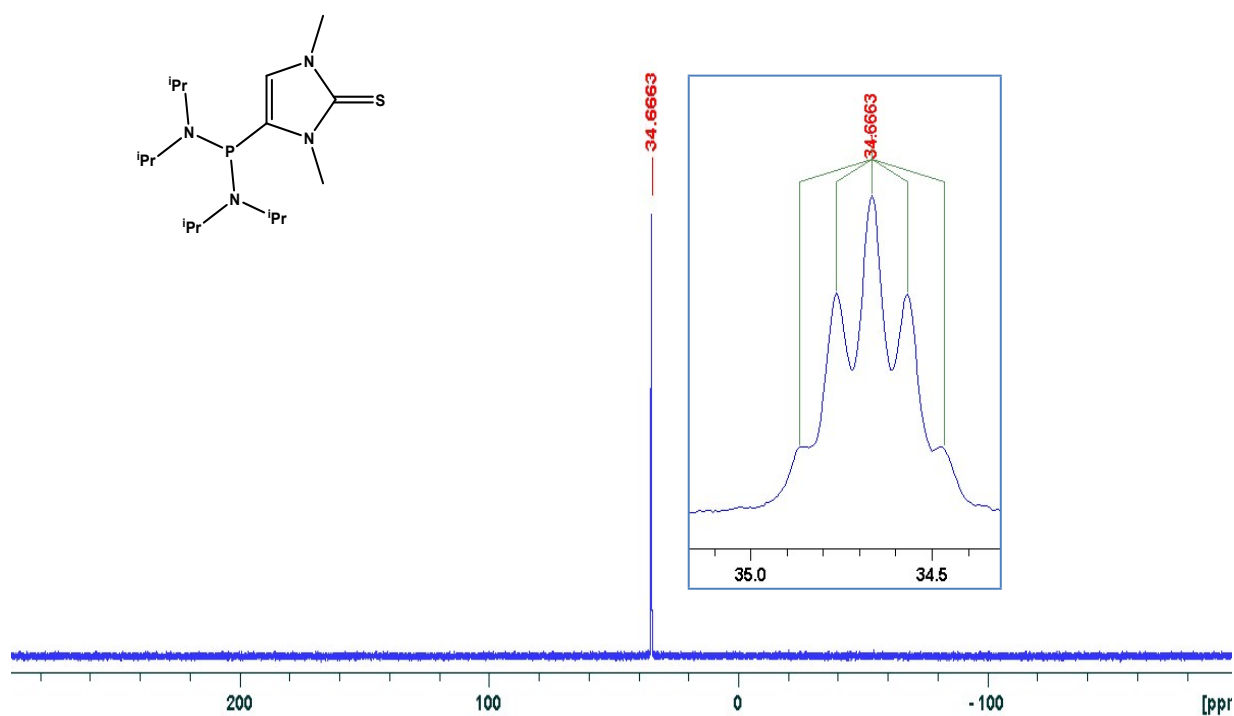

Figure S12: EI-MS spectrum of **2c**.

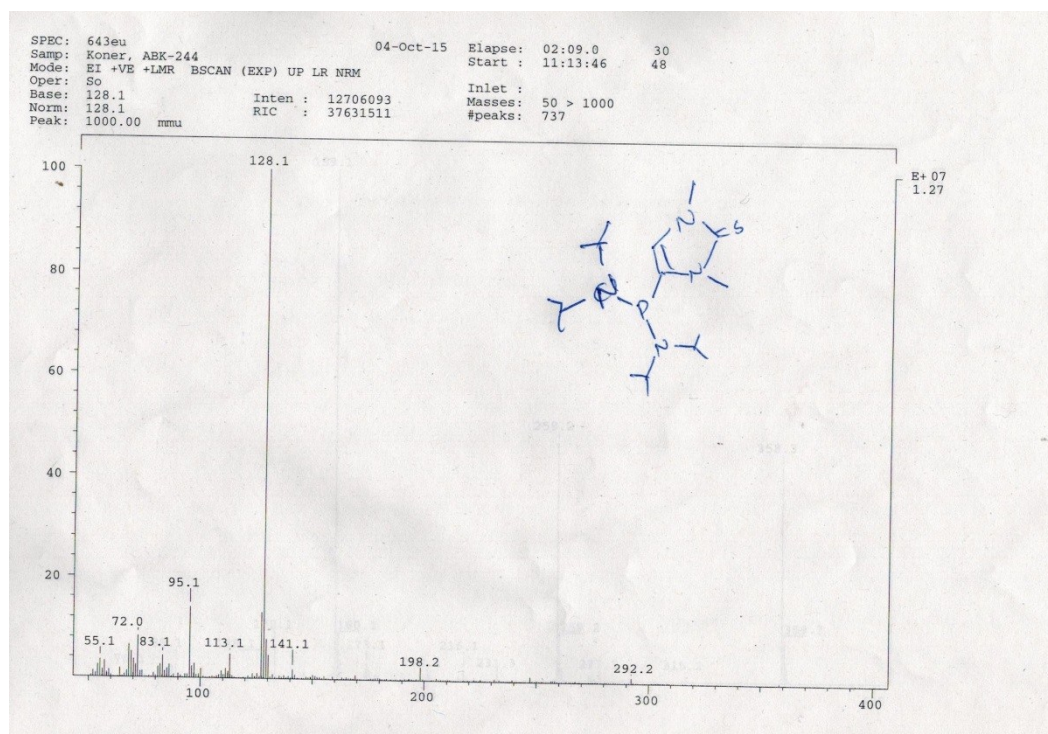

## 4 Spectra for Compound **3a**.

Figure S13:  $^1\text{H}$  NMR spectrum of **3a** in  $\text{CDCl}_3$  (300.1 MHz, 25 °C)

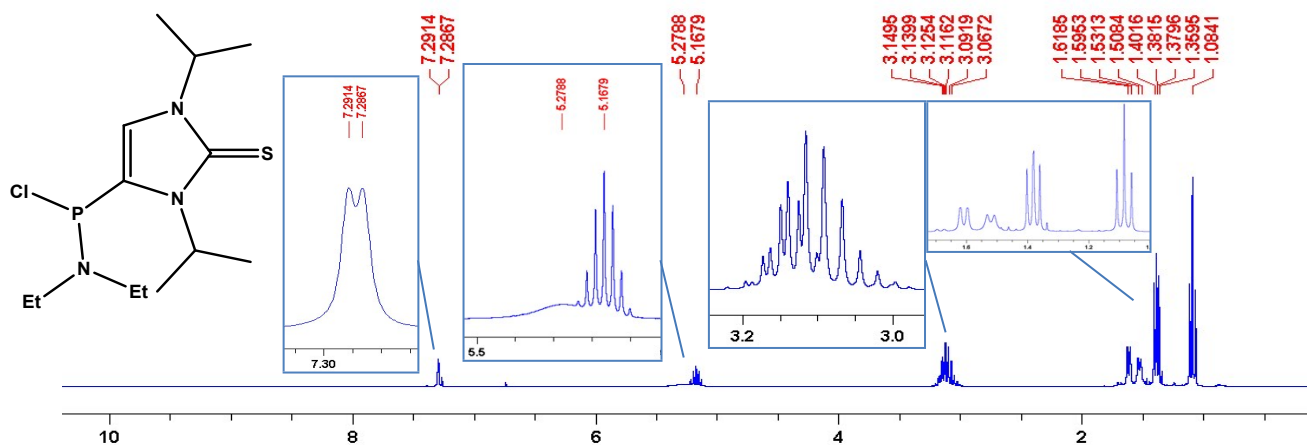

Figure S14:  $^{13}\text{C}$   $\{^1\text{H}\}$  NMR spectrum of **3a** in  $\text{CDCl}_3$  (75.5 MHz, 25 °C)

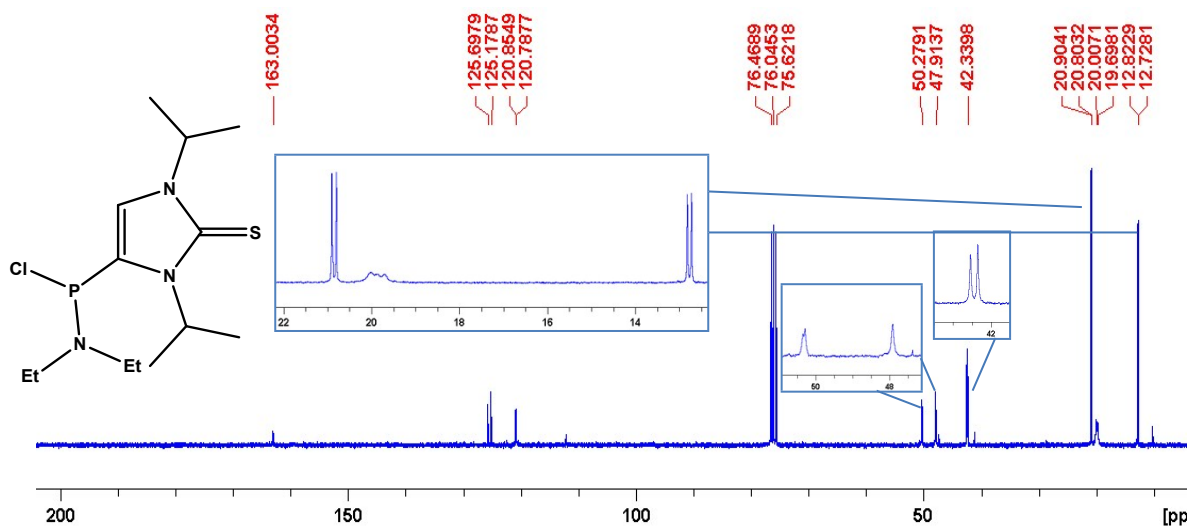



Figure S15:  $^{31}\text{P}$  NMR spectrum of **3a** in  $\text{CDCl}_3$  (121.5 MHz, 25 °C)

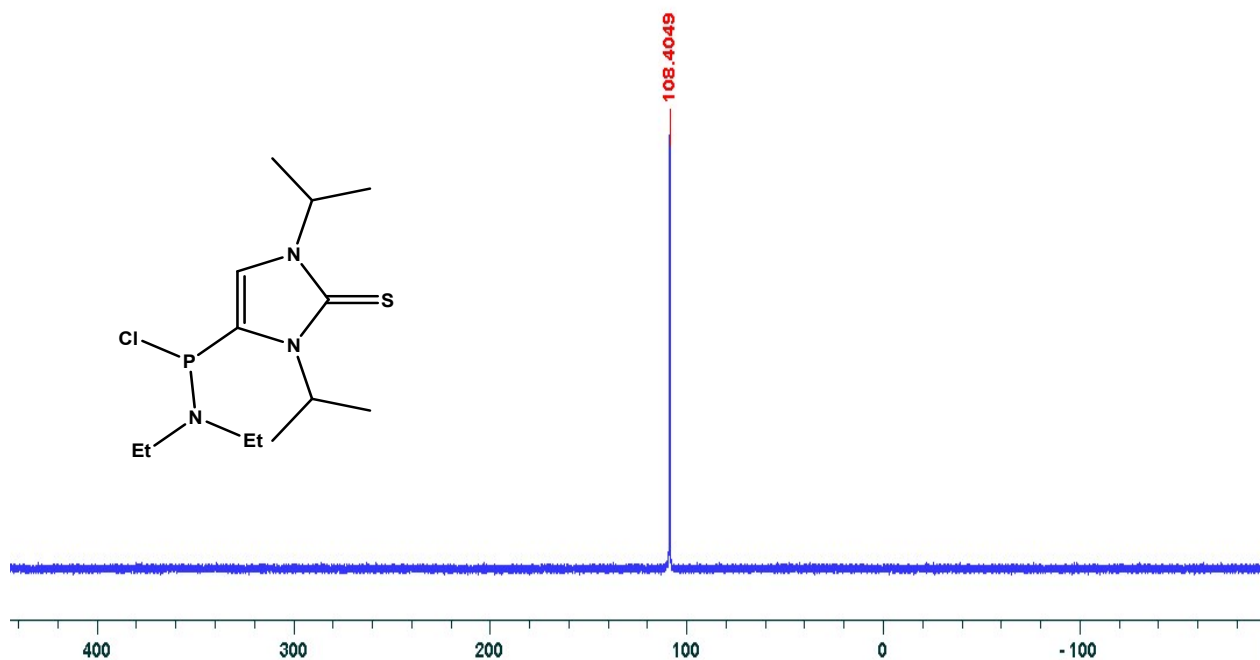

Figure S16: EI-MS spectrum of **3a**.

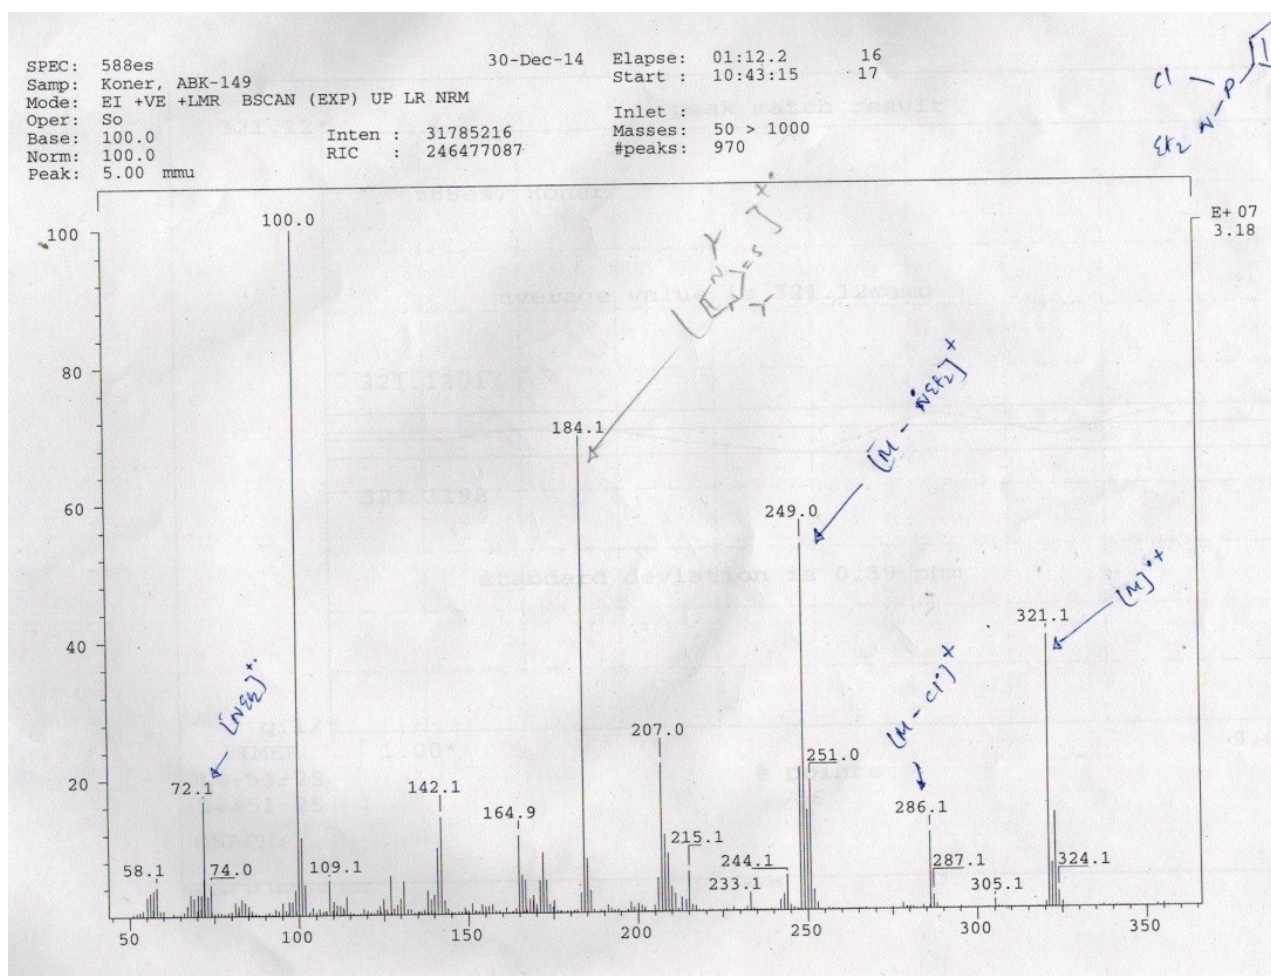

## 5 Spectra for Compound **3b**.

Figure S17:  $^1\text{H}$  NMR spectrum of **3b** in  $\text{CDCl}_3$  (300.1 MHz, 25 °C)

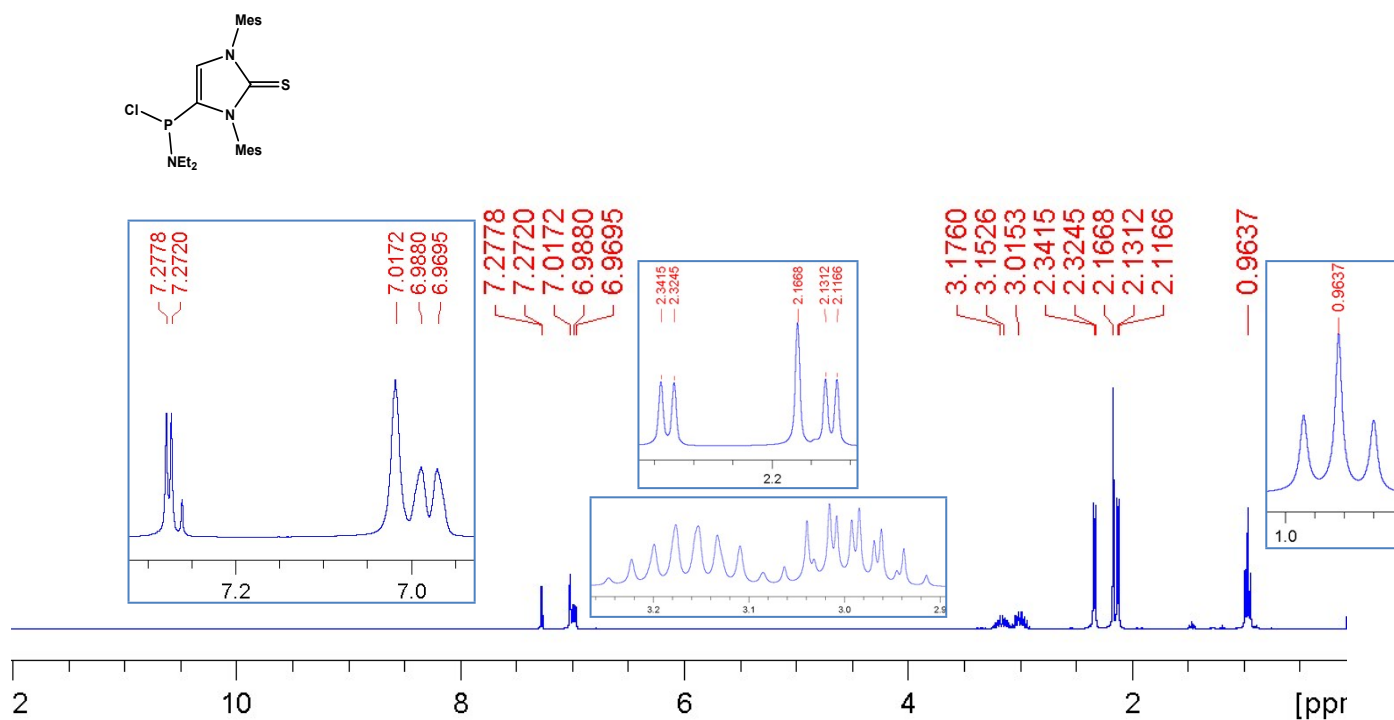

Figure S18:  $^{13}\text{C}\{^1\text{H}\}$  NMR spectrum of **3b** in  $\text{CDCl}_3$  (75.5 MHz, 25 °C)

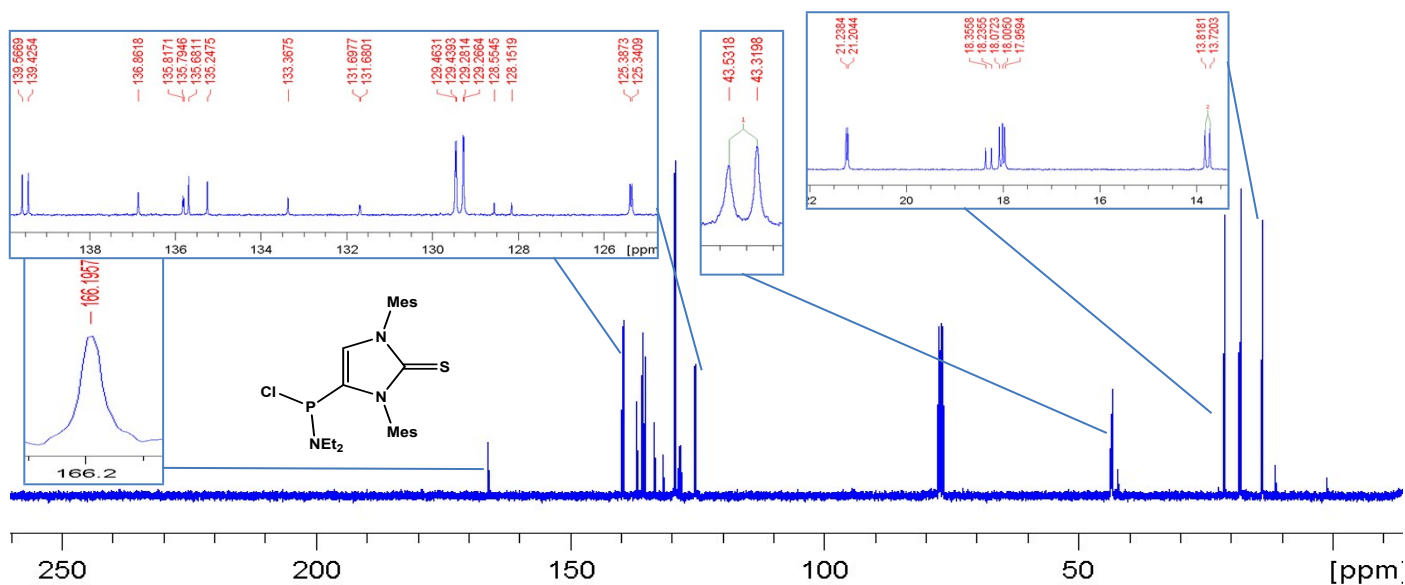

Figure S19:  $^{31}\text{P}$  NMR spectrum of **3b** in  $\text{CDCl}_3$  (121.5 MHz, 25 °C)

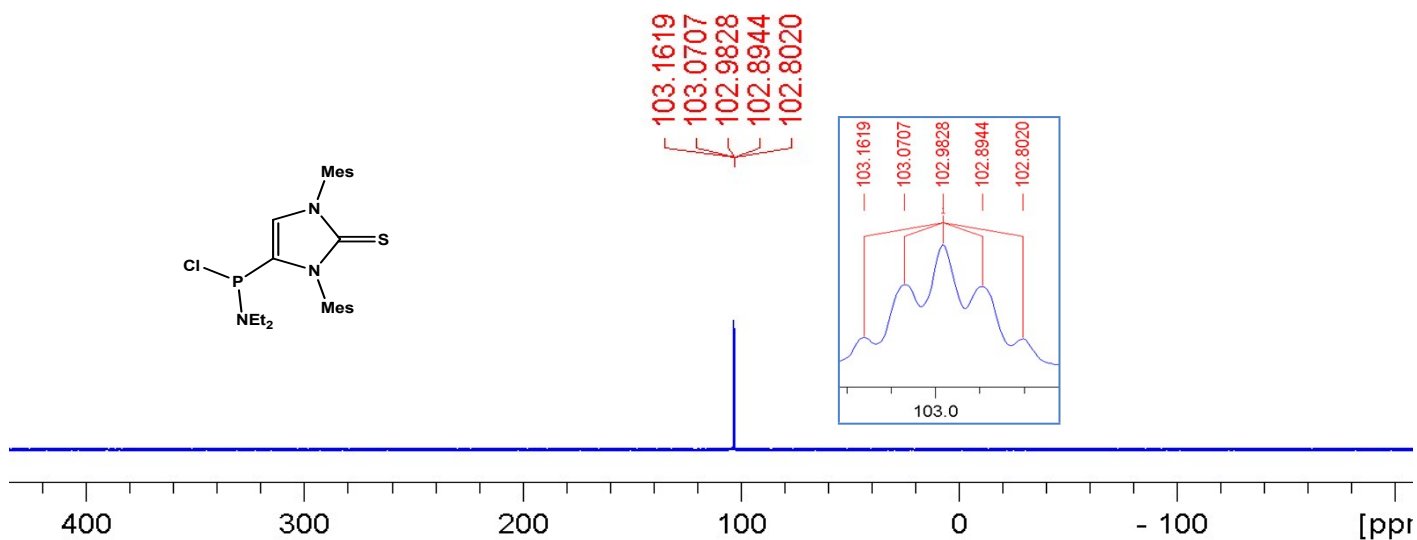

Figure S20: EI-MS spectrum of **3b**.

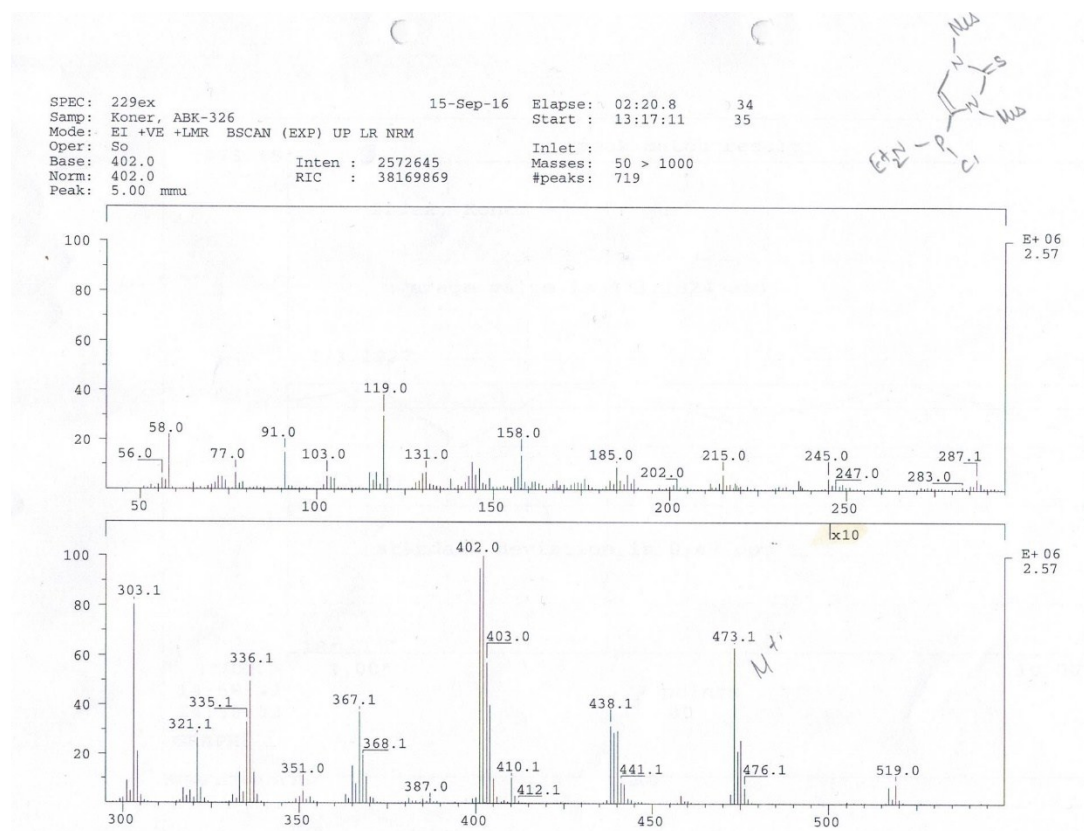

## 6 Spectra for Compound **3c**.

Figure S21:  $^1\text{H}$  NMR spectrum of **3c** in  $\text{CDCl}_3$  (300.1 MHz, 25 °C)

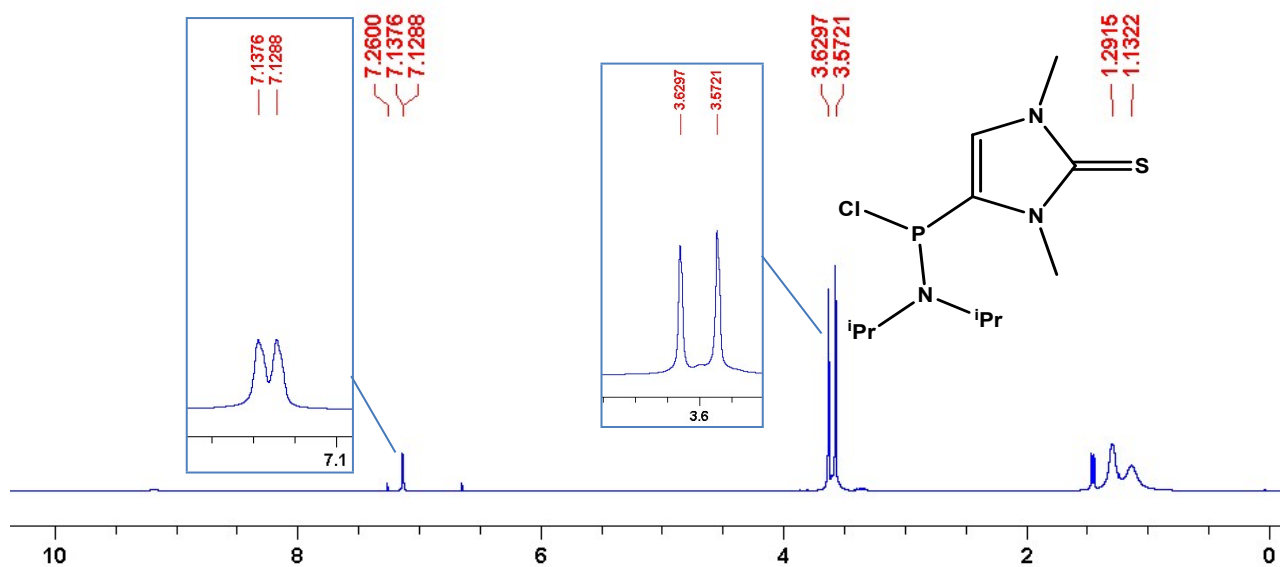

Figure S22:  $^{13}\text{C}$   $\{^1\text{H}\}$  NMR spectrum of **3c** in  $\text{CDCl}_3$  (75.5 MHz, 25 °C)

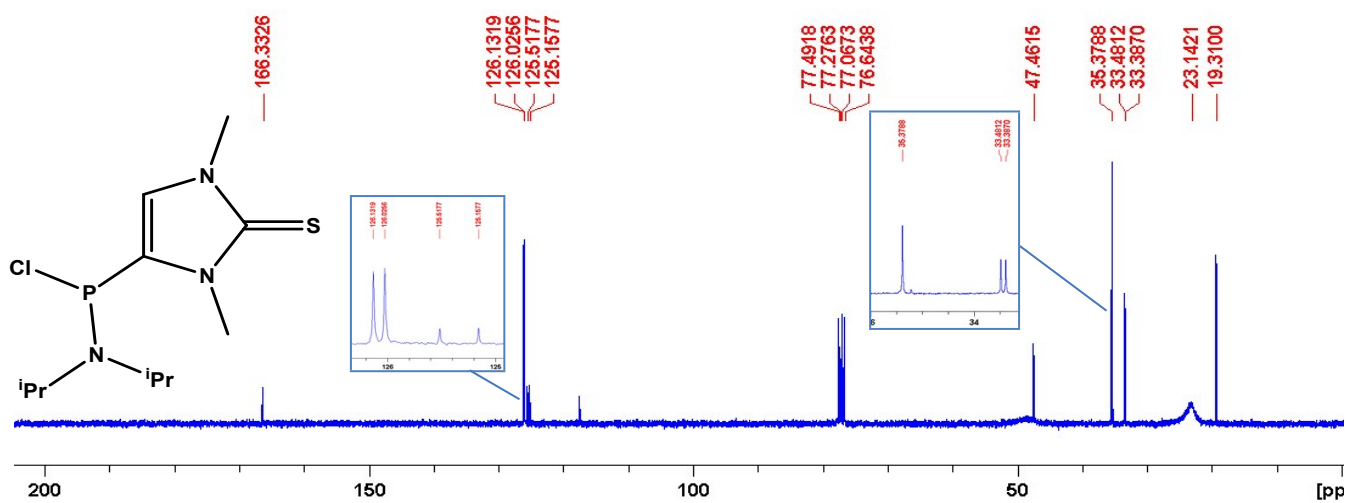

Figure S23:  $^{31}\text{P}$  NMR spectrum of **3c** in  $\text{CDCl}_3$  (121.5 MHz, 25 °C)

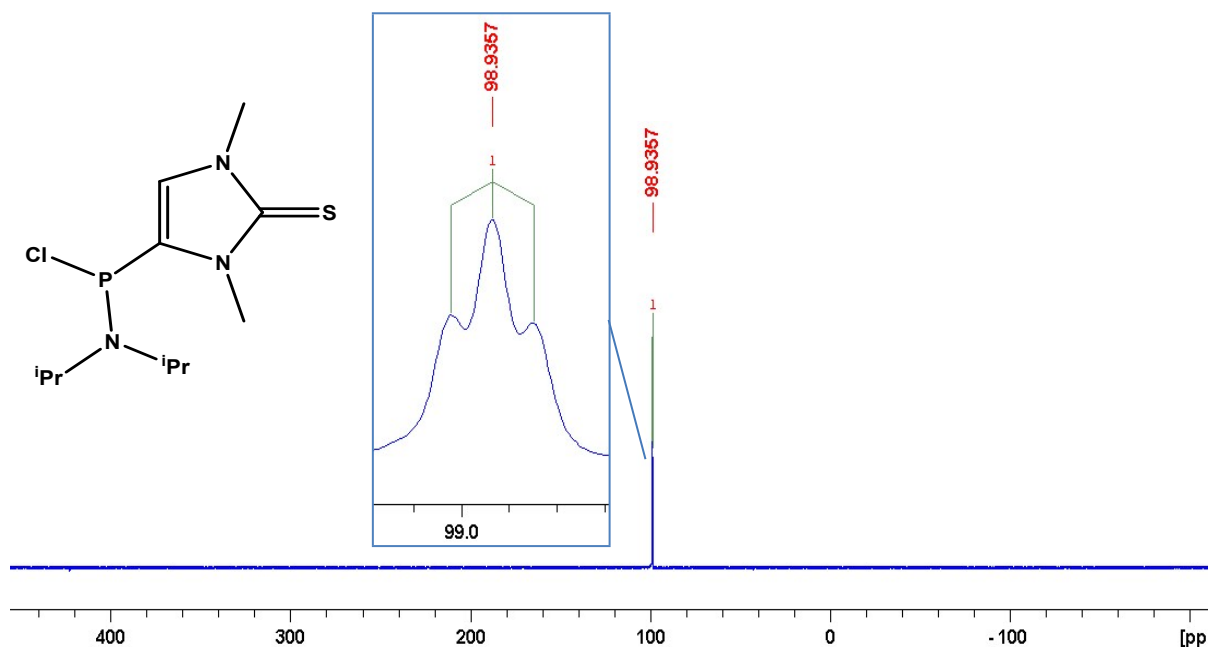

Figure S24: EI-MS spectrum of **3c**.

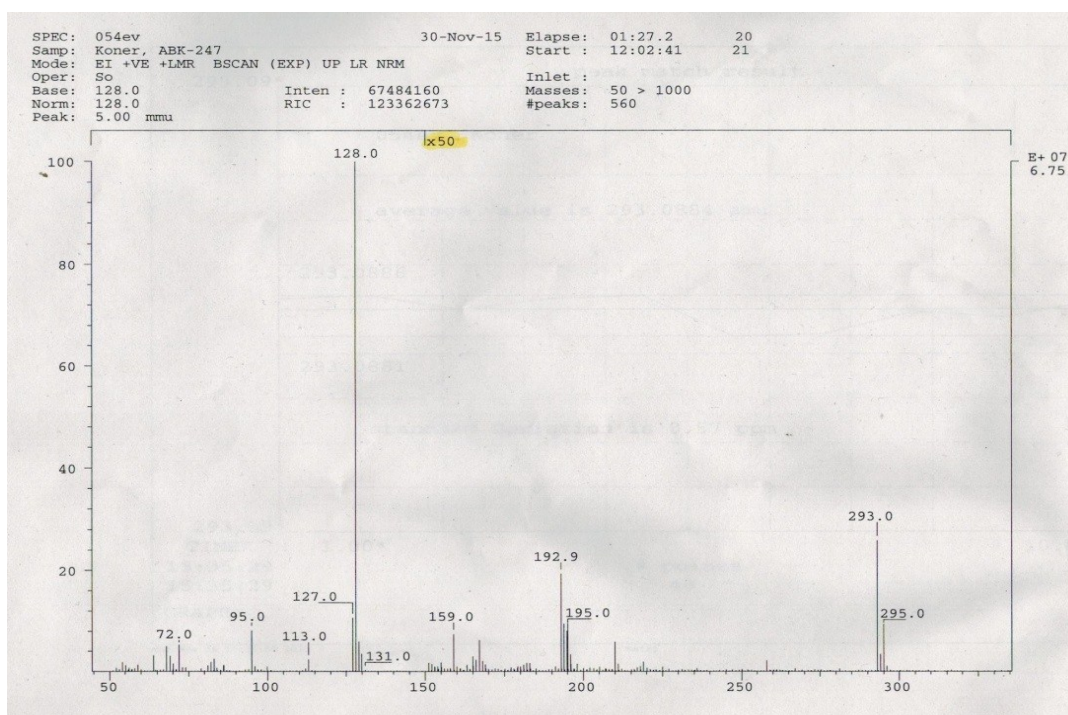



## 7 Spectra for Compound 4a.

Figure S25:  $^1\text{H}$  NMR spectrum of **4a** in  $\text{CDCl}_3$  (300.1 MHz, 25 °C)

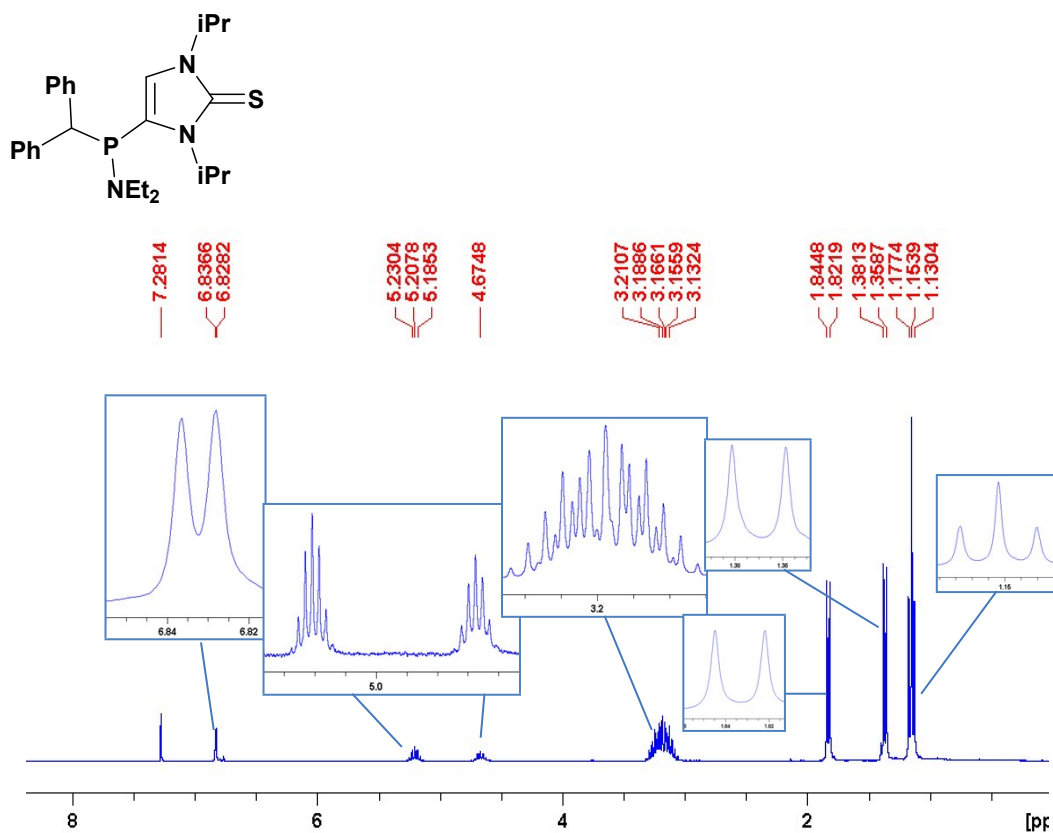

Figure S26:  $^{13}\text{C}$   $\{^1\text{H}\}$  NMR spectrum of **4a** in  $\text{CDCl}_3$  (75.5 MHz, 25 °C)

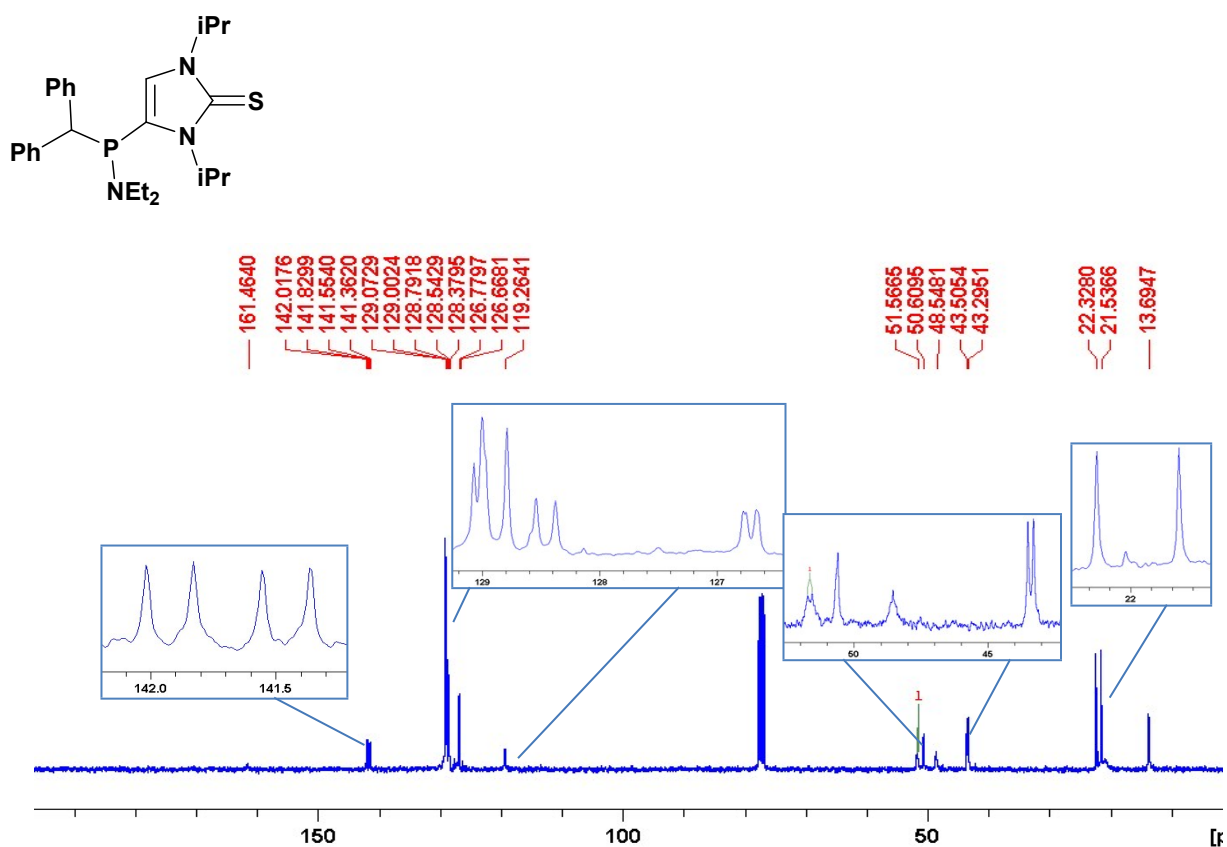



Figure S27:  $^{31}\text{P}$  NMR spectrum of **4a** in  $\text{CDCl}_3$  (121.5 MHz, 25 °C)

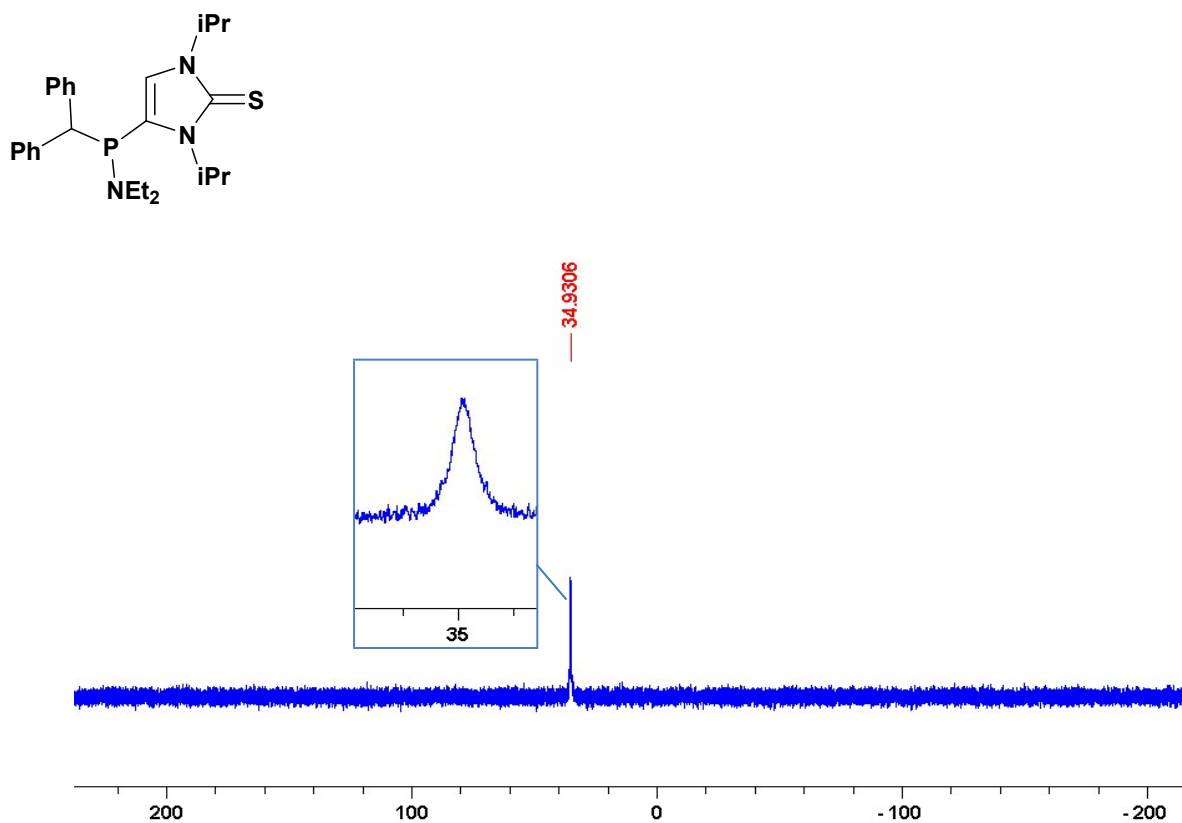

Figure S28: EI-MS spectrum of **4a**.

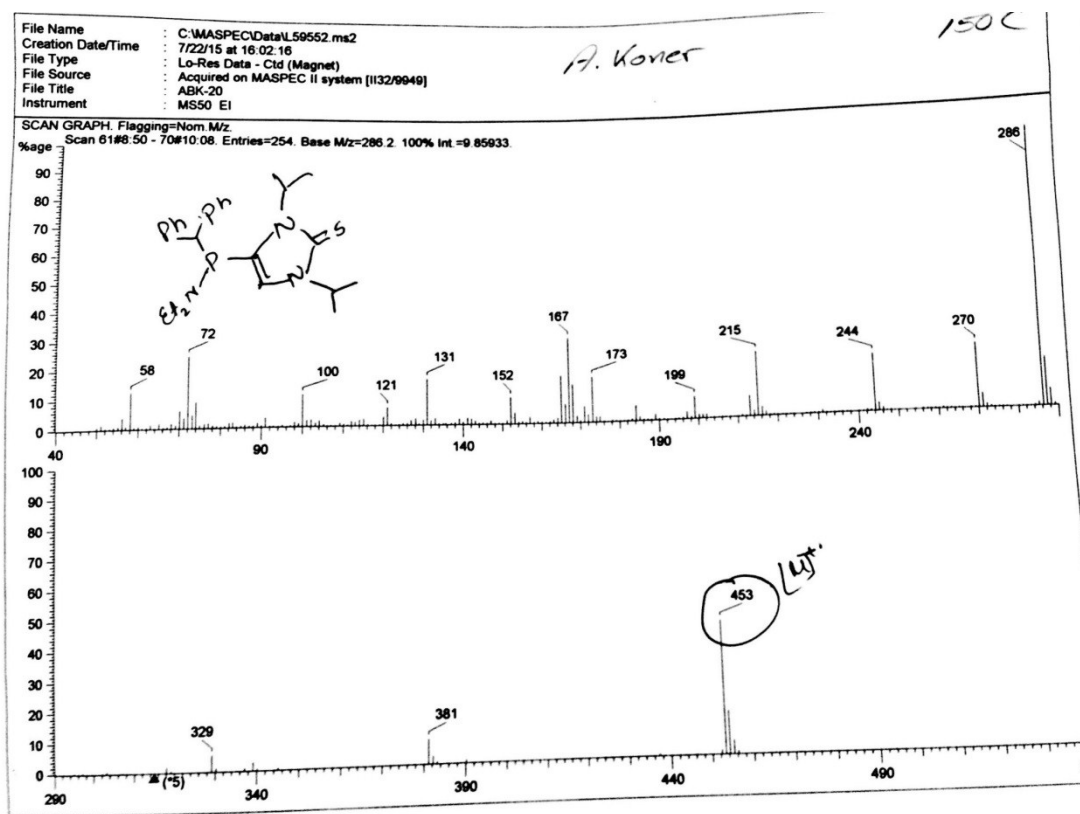

## 8 Spectra for Compound **4b**.

Figure S29:  $^1\text{H}$  NMR spectrum of **4b** in  $\text{CDCl}_3$  (300.1 MHz, 25 °C)

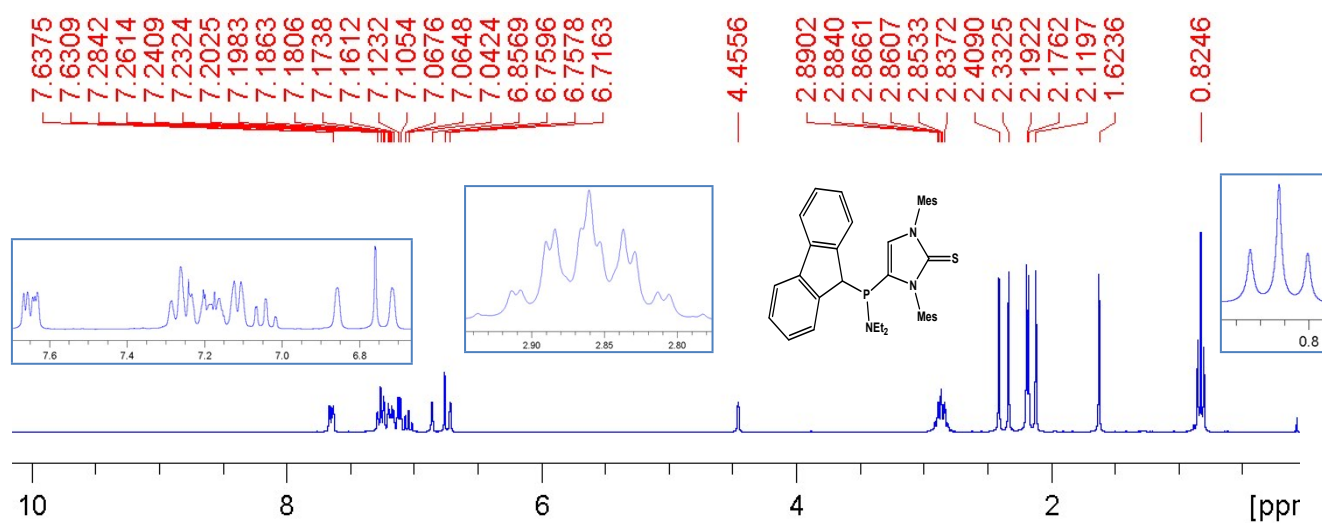

Figure S30:  $^{13}\text{C}$   $\{^1\text{H}\}$  NMR spectrum of **4b** in  $\text{CDCl}_3$  (75.5 MHz, 25 °C)

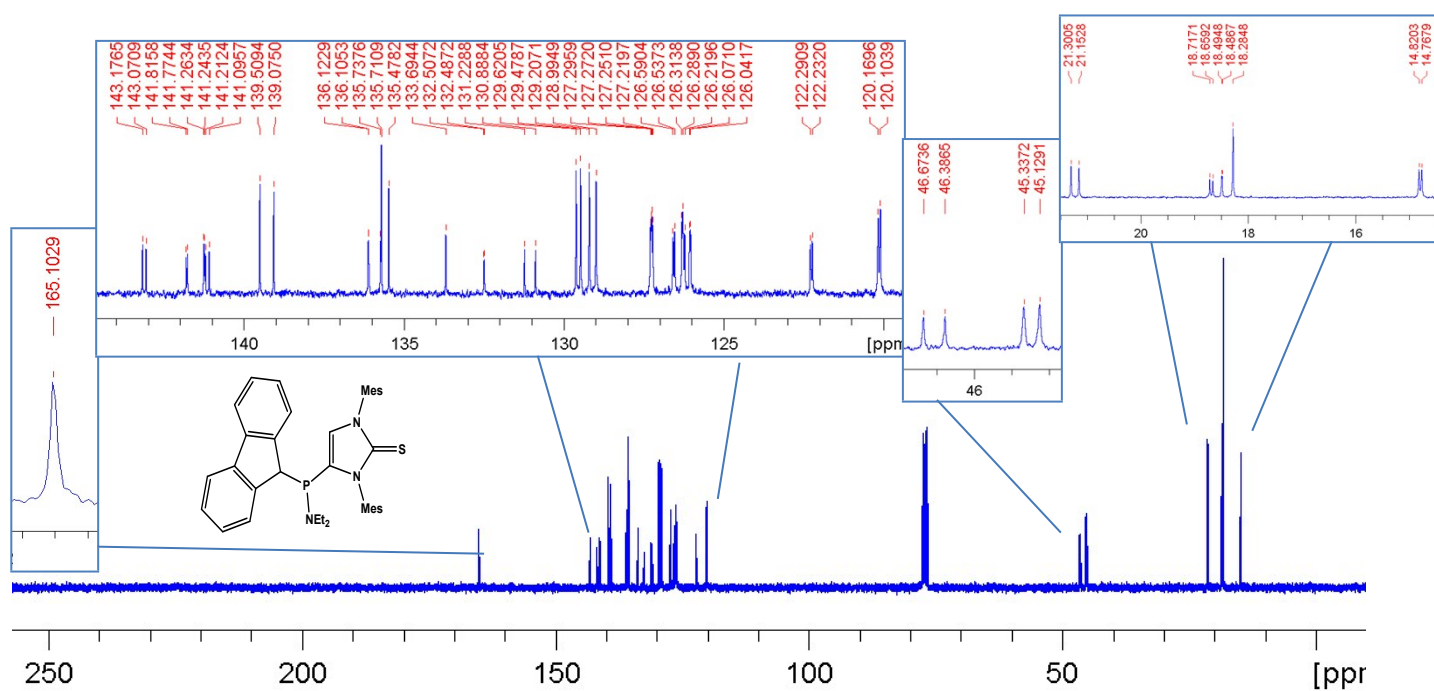

Figure S31:  $^{31}\text{P}$  NMR spectrum of **4b** in  $\text{CDCl}_3$  (121.5 MHz, 25 °C)

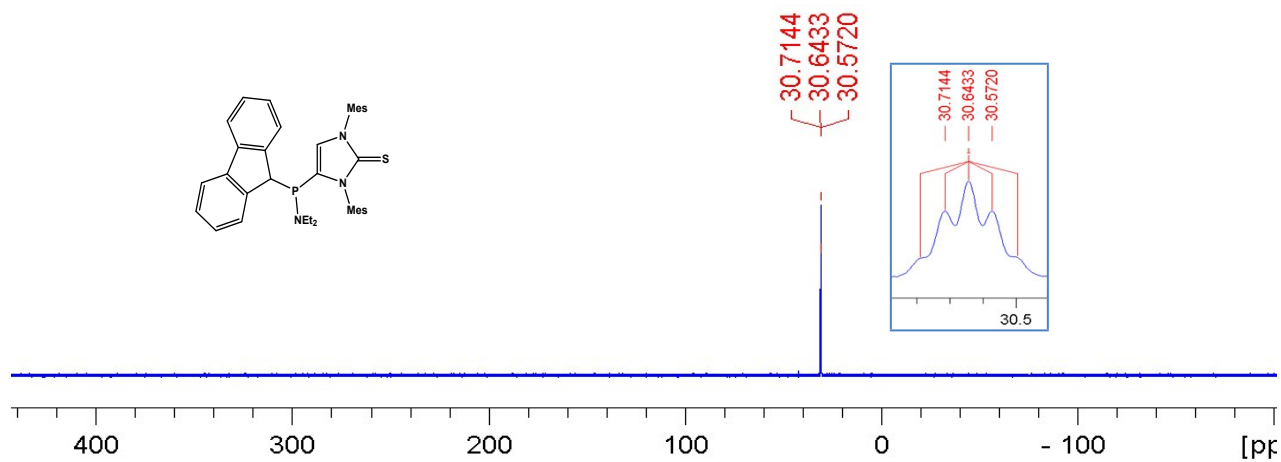

Figure 32: EI-MS spectrum of **4b**.

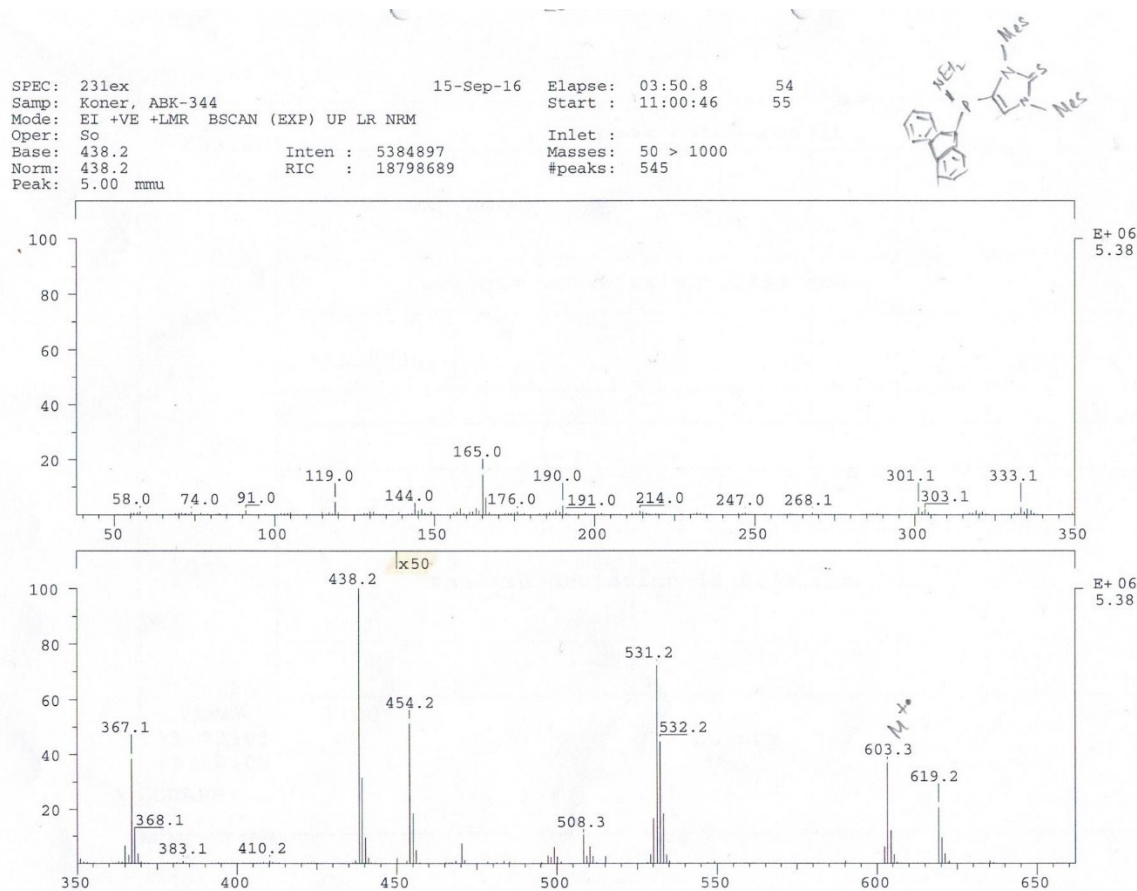

## 9 Spectra for Compound 4c.

Figure S33:  $^1\text{H}$  NMR spectrum of **4c** in  $\text{CDCl}_3$  (300.1 MHz, 25 °C)

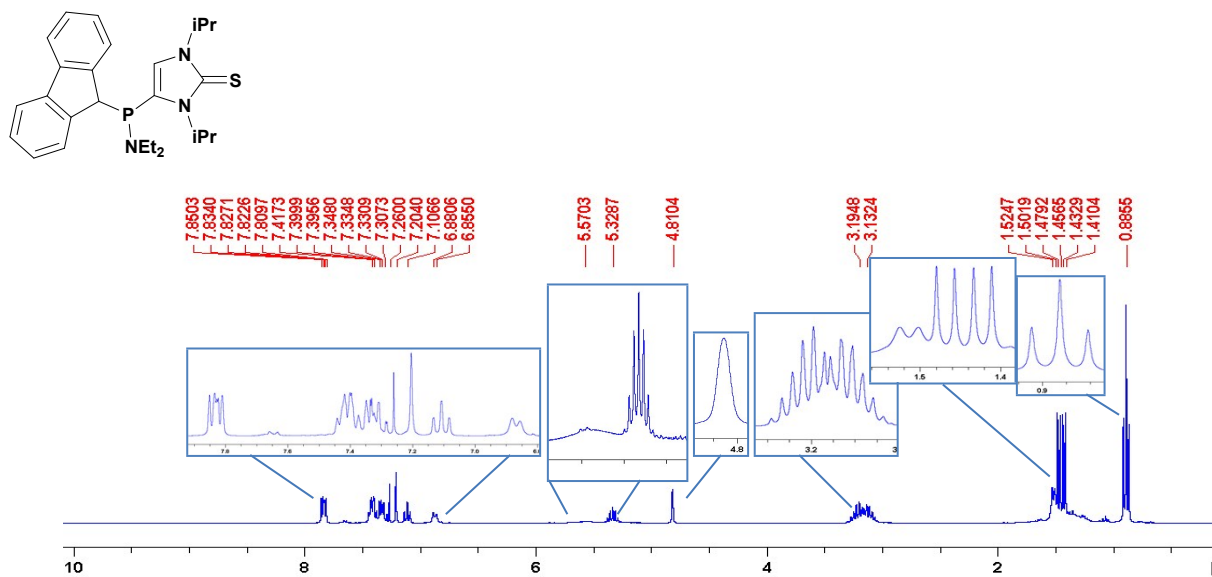

Figure S34:  $^{13}\text{C}$   $\{^1\text{H}\}$  NMR spectrum of **4c** in  $\text{CDCl}_3$  (75.5 MHz, 25 °C)

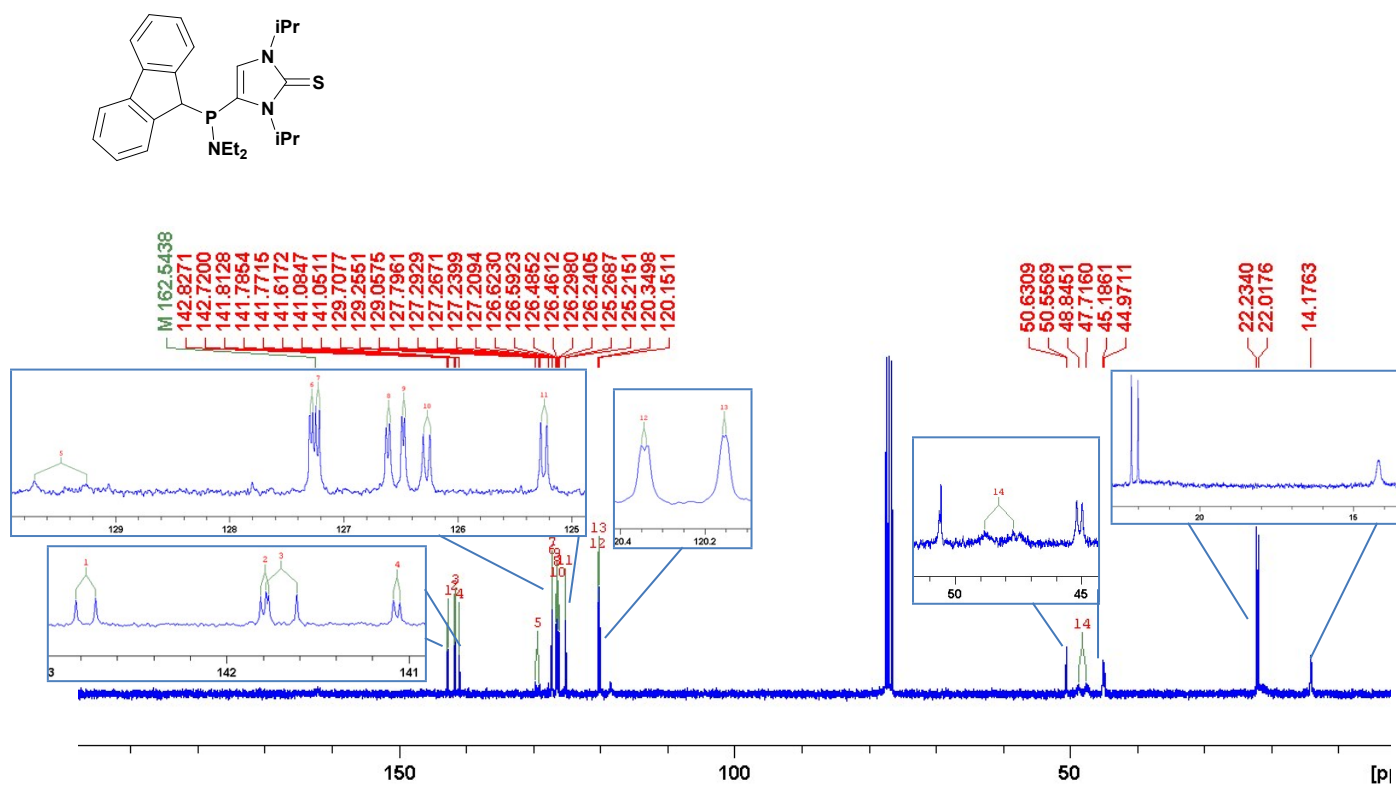





## 10 Spectra for Compound 5.

Figure S37:  $^1\text{H}$  NMR spectrum of **5** in  $\text{CDCl}_3$  (300.1 MHz, 25 °C)

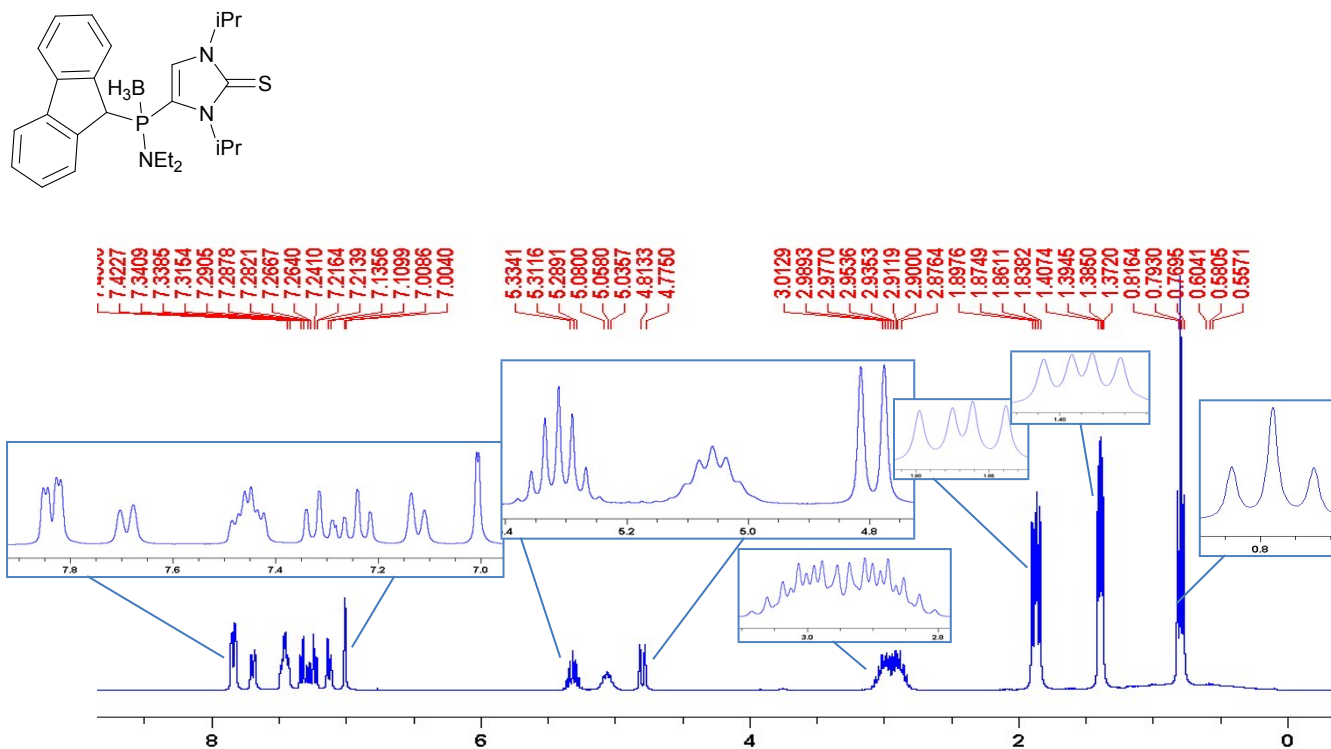

Figure S38:  $^{13}\text{C}$   $\{^1\text{H}\}$  NMR spectrum of **5** in  $\text{CDCl}_3$  (75.5 MHz, 25 °C)

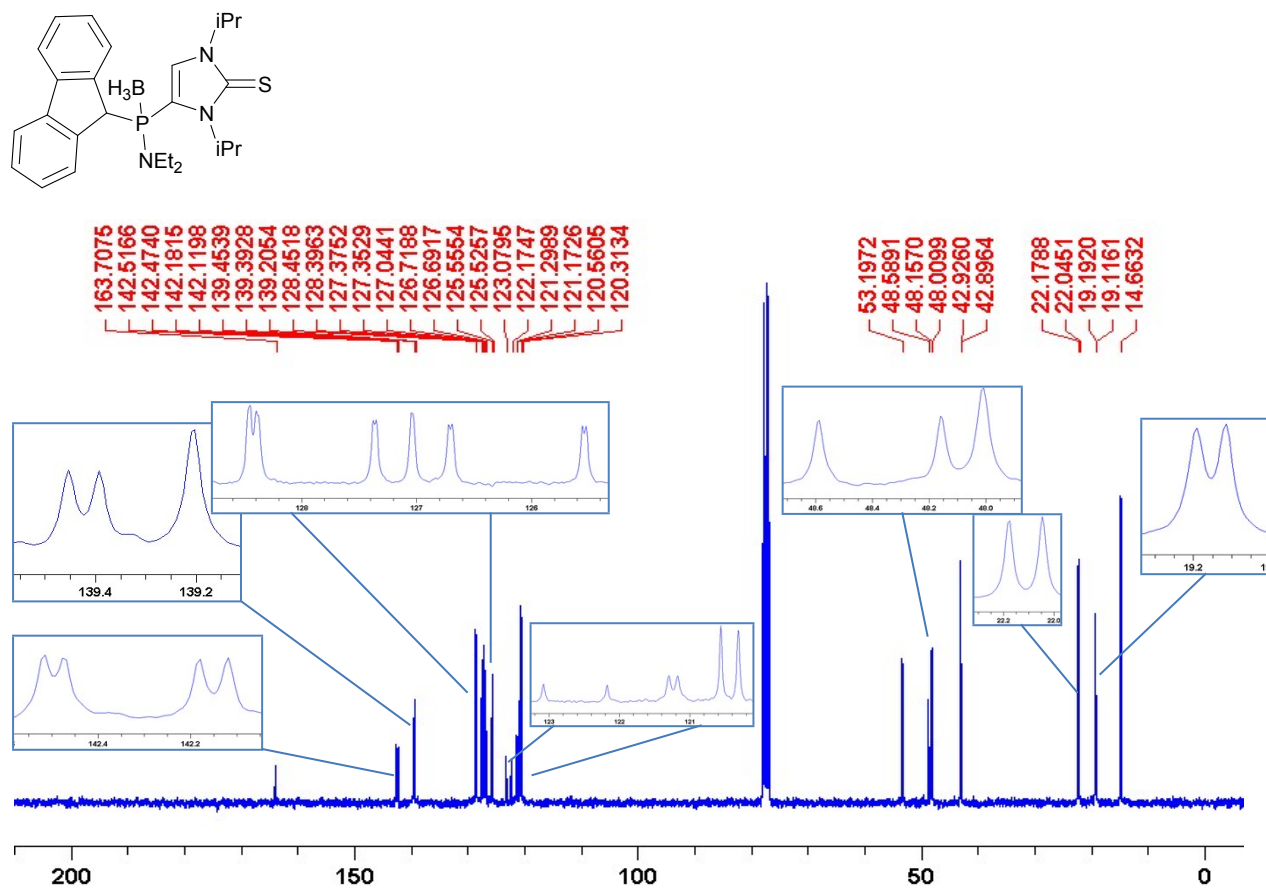



Figure S39:  $^{31}\text{P}$  NMR spectrum of **5** in  $\text{CDCl}_3$  (121.5 MHz, 25 °C)

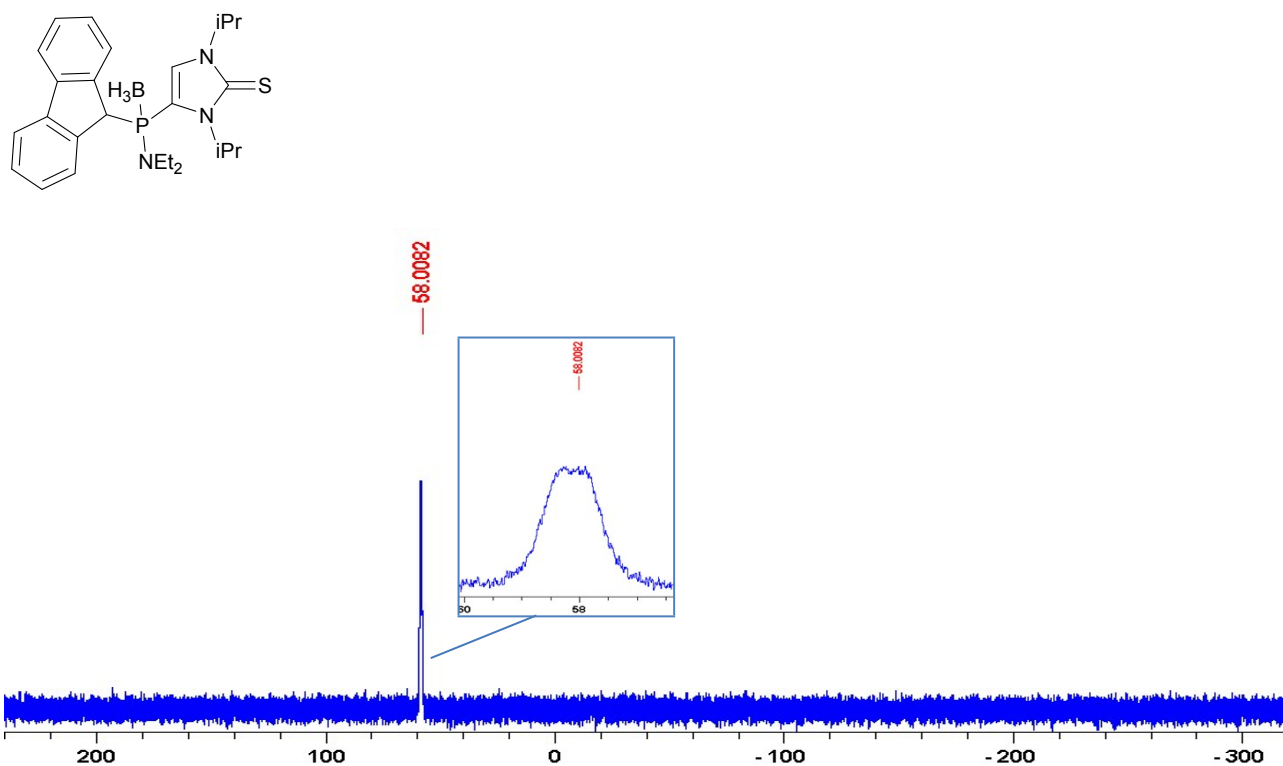

Figure 40: EI-MS spectrum of **5**.

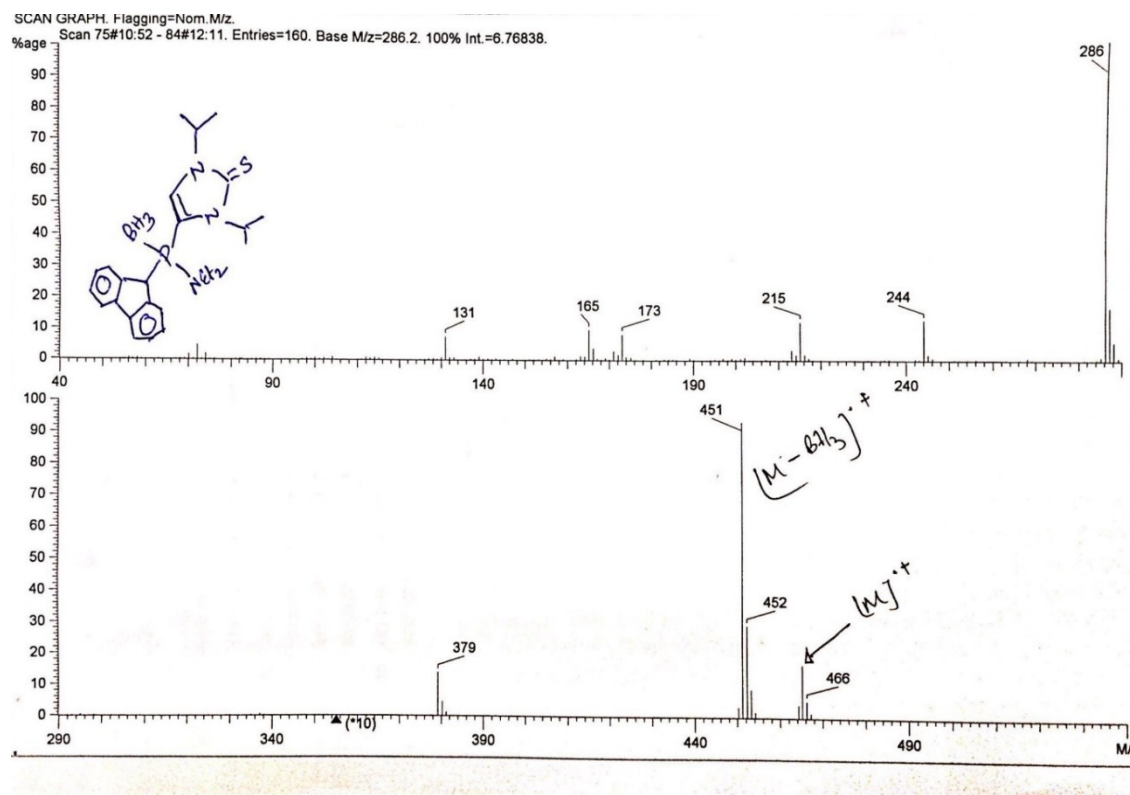

## 11 Spectra for Compound 6.

Figure S41:  $^1\text{H}$  NMR spectrum of **6** in  $\text{CDCl}_3$  (300.1 MHz, 25 °C)

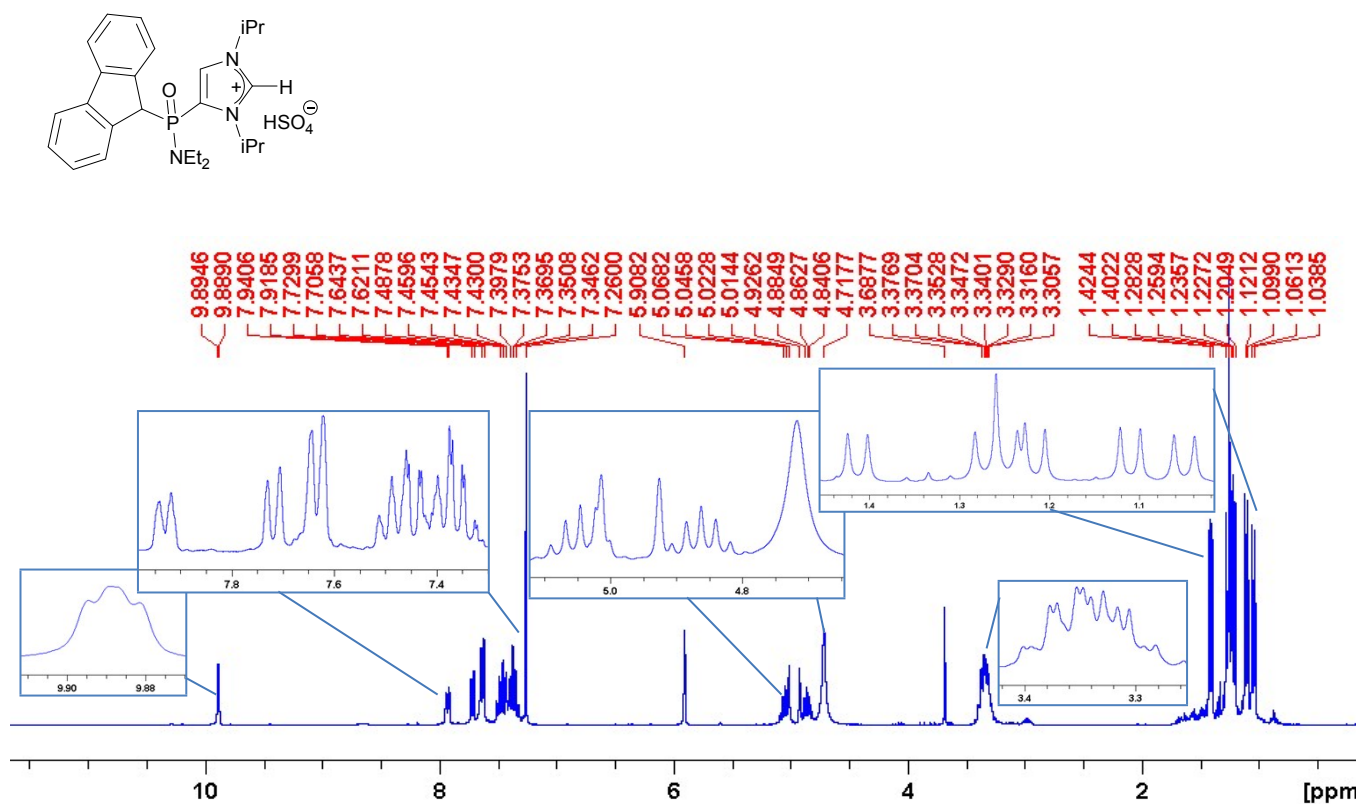

Figure S42:  $^{13}\text{C}$   $\{^1\text{H}\}$  NMR spectrum of **6** in  $\text{CDCl}_3$  (75.5 MHz, 25 °C)

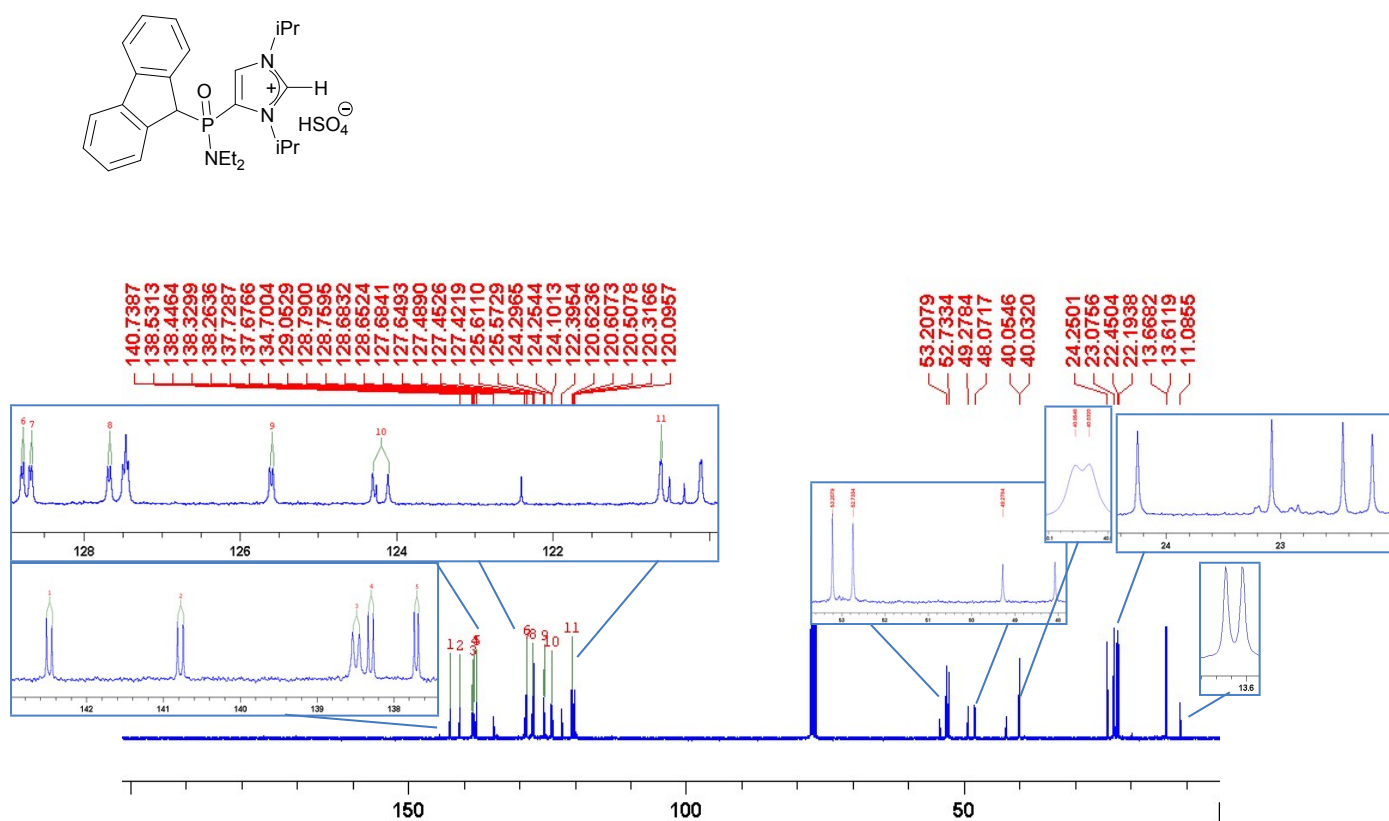

Figure S43:  $^{31}\text{P}\{^1\text{H}\}$  NMR spectrum of **6** in  $\text{CDCl}_3$  (121.5 MHz, 25 °C)

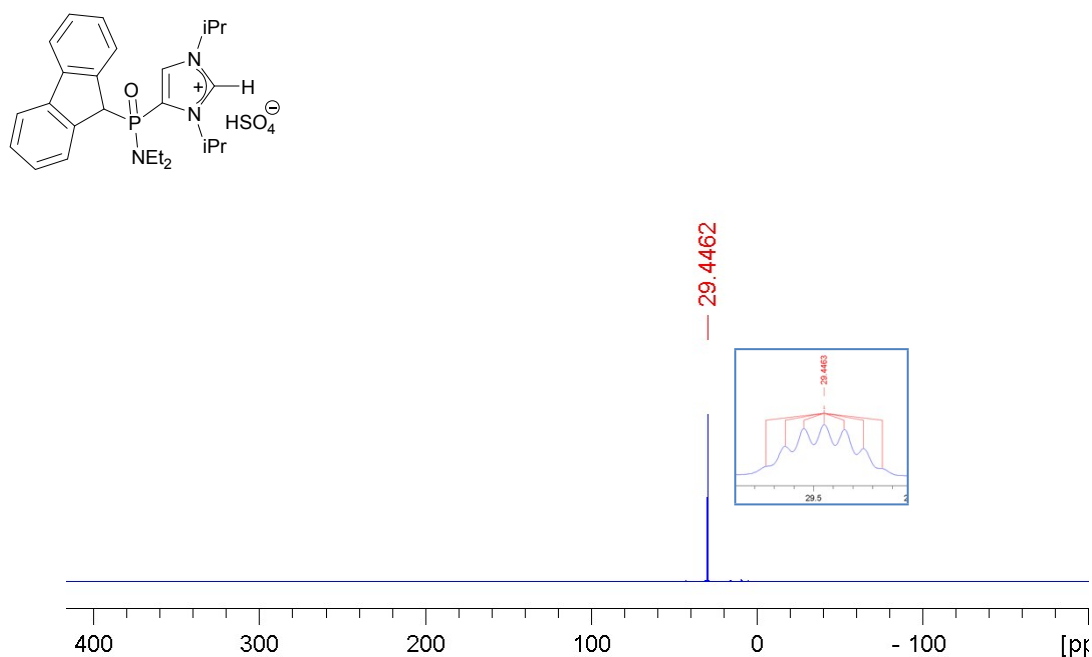

Figure 44: ESI-MS spectrum of **6**.

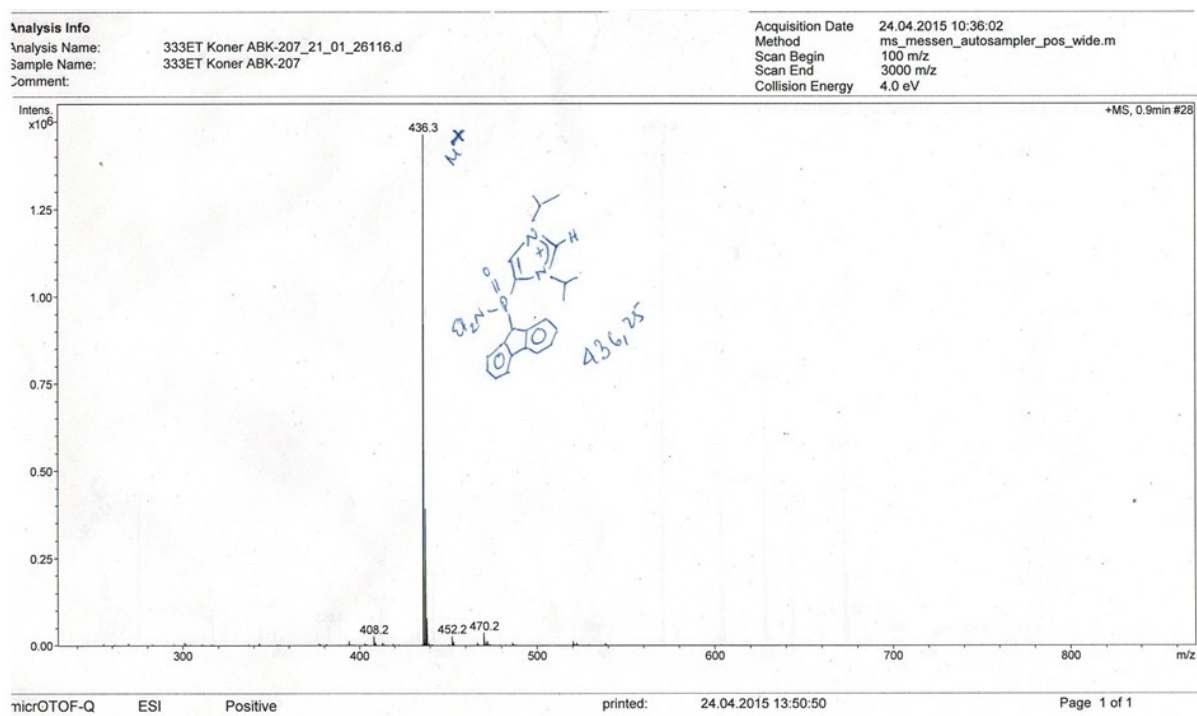

## 12 Spectra for Compound 7a.

Figure S45:  $^1\text{H}$  NMR spectrum of **7a** in  $\text{CDCl}_3$  (300.1 MHz, 25 °C)

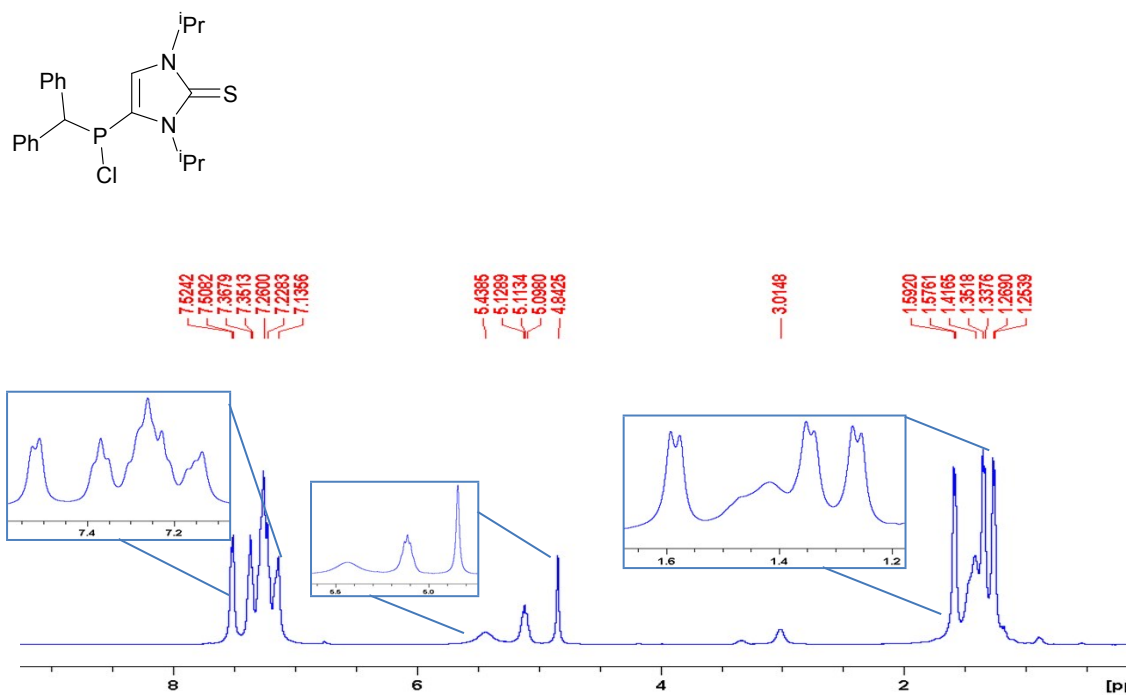

Figure S46:  $^{13}\text{C}$   $\{^1\text{H}\}$  NMR spectrum of **7a** in  $\text{CDCl}_3$  (75.5 MHz, 25 °C)

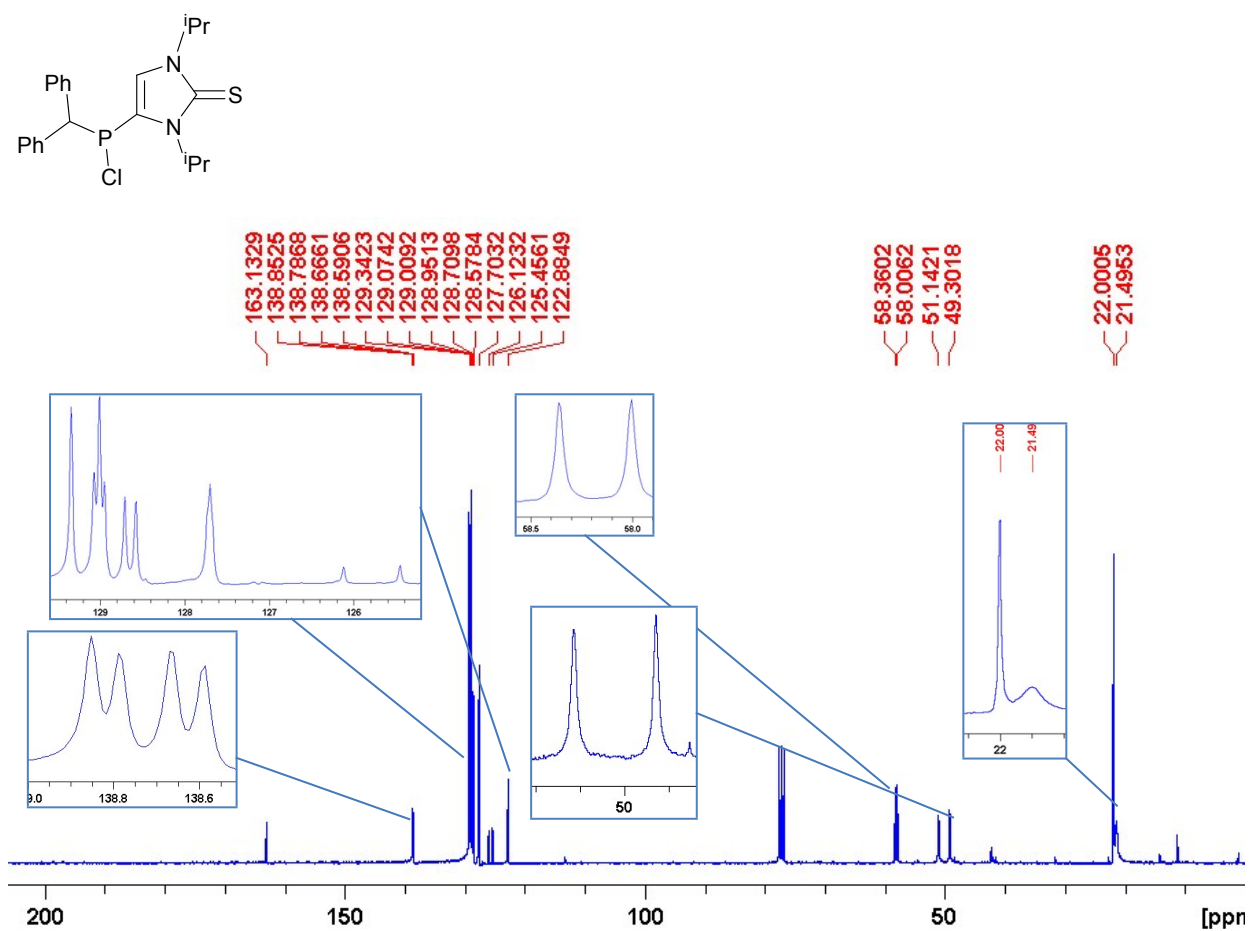

Figure S47:  $^{31}\text{P}$  NMR spectrum of **7a** in  $\text{CDCl}_3$  (121.5 MHz, 25 °C)

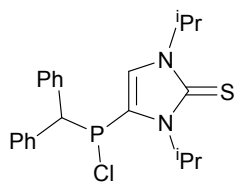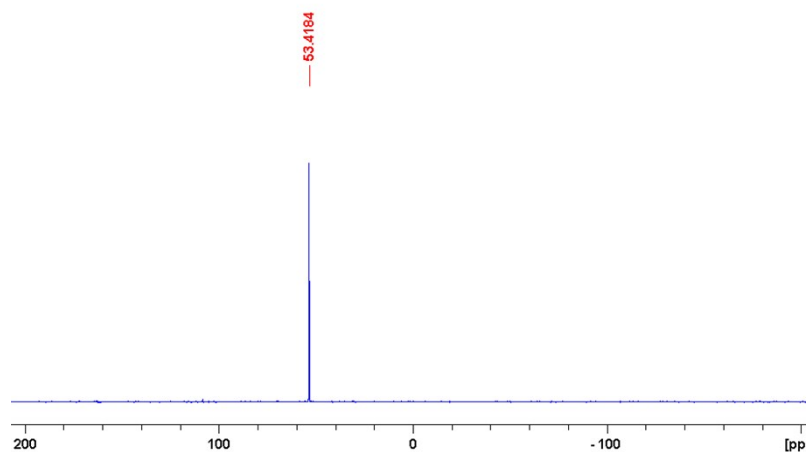

Figure 48: EI-MS spectrum of **7a**.

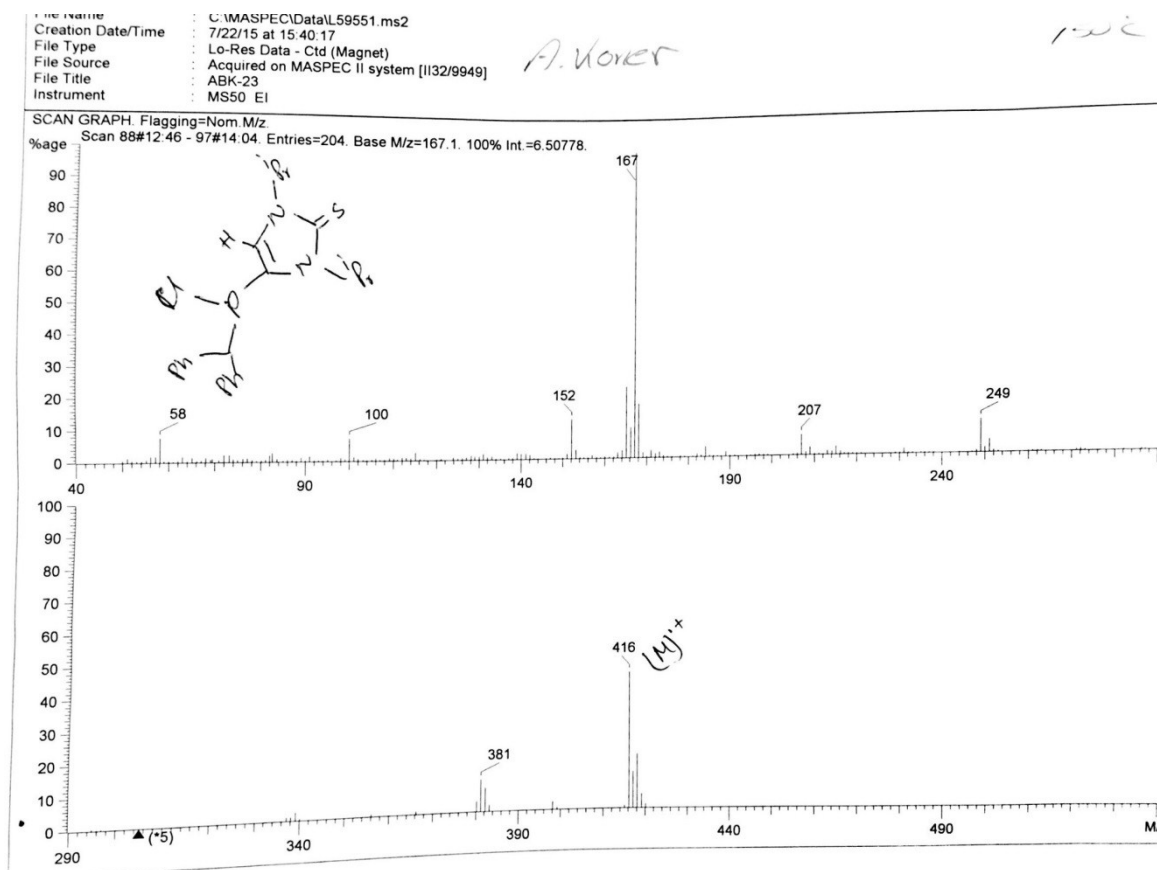

### 13 Spectra for Compound **7b**.

Figure S49:  $^1\text{H}$  NMR spectrum of **7b** in  $\text{CDCl}_3$  (300.1 MHz, 25 °C)

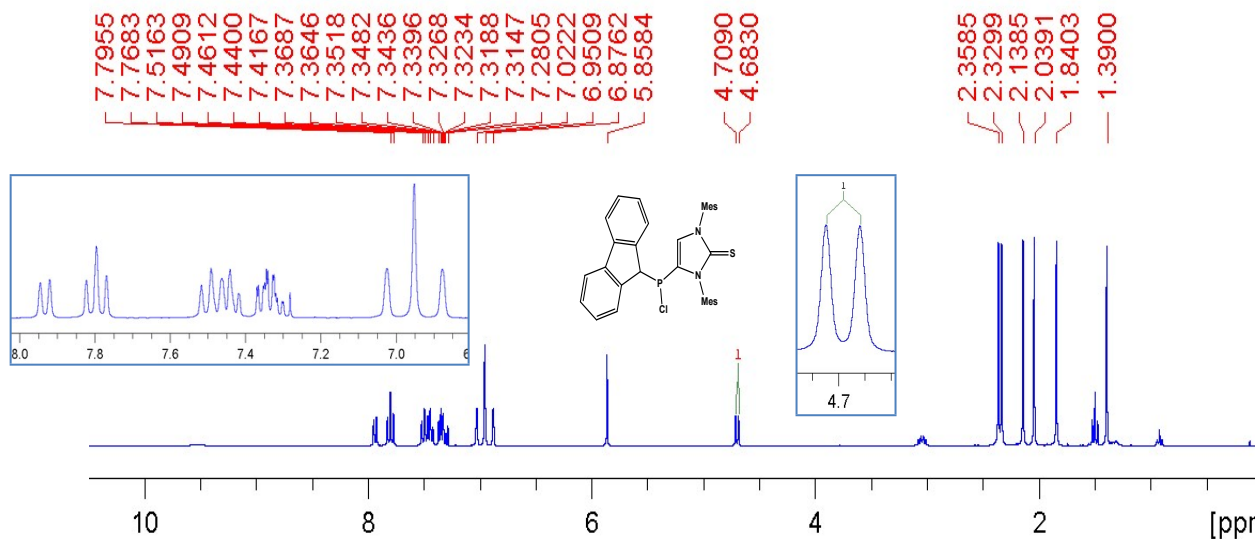

Figure S50:  $^{13}\text{C}$   $\{^1\text{H}\}$  NMR spectrum of **7b** in  $\text{CDCl}_3$  (75.5 MHz, 25 °C)

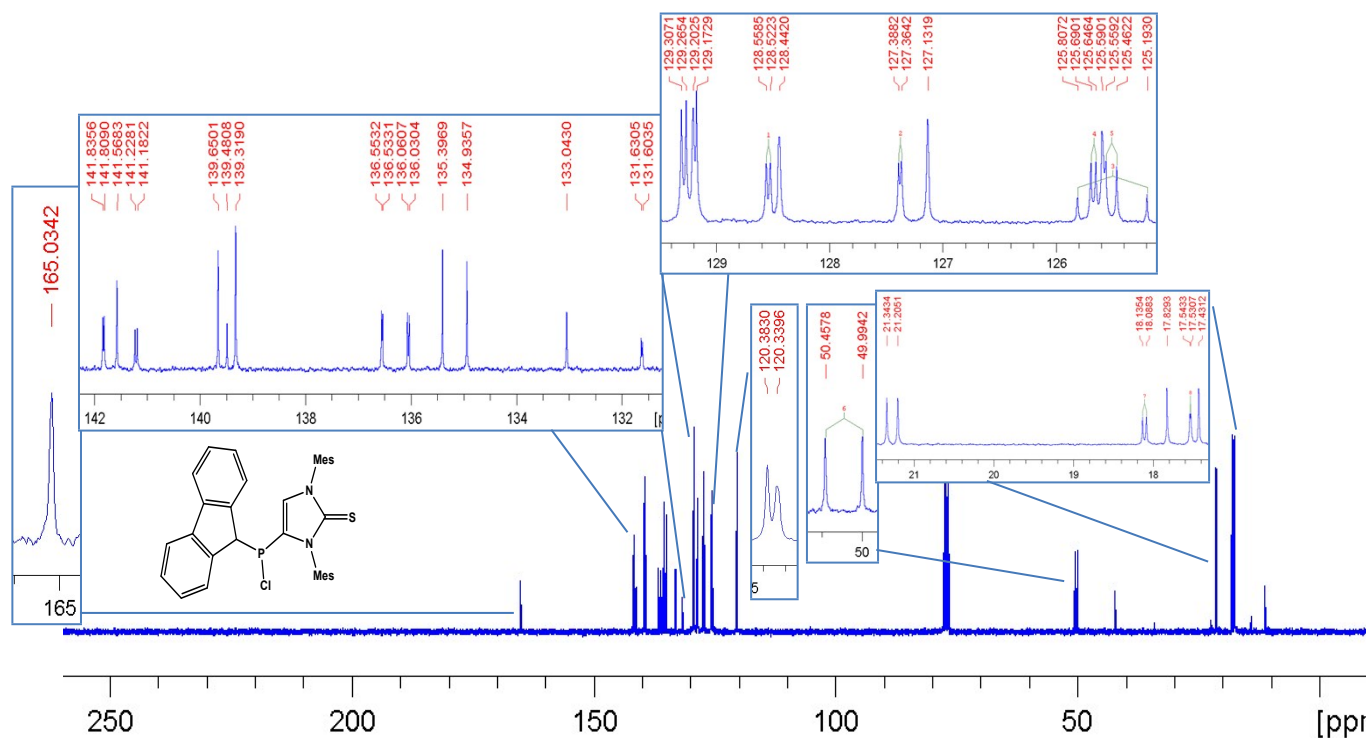



Figure S51:  $^{31}\text{P}$  NMR spectrum of **7b** in  $\text{CDCl}_3$  (121.5 MHz, 25 °C)

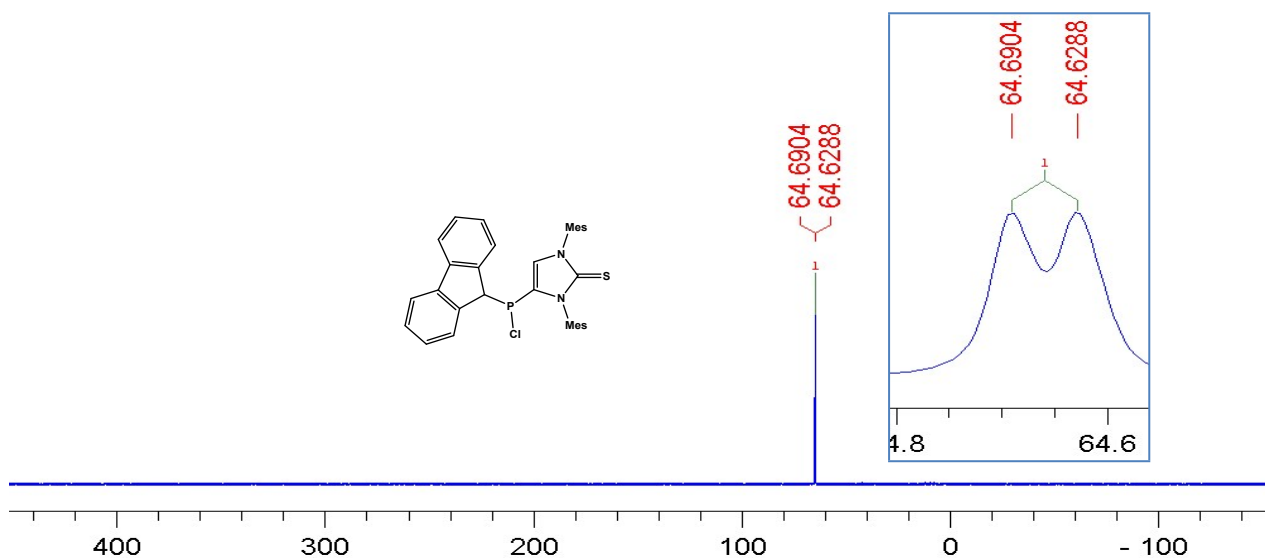

Figure 52: EI-MS spectrum of **7b**.

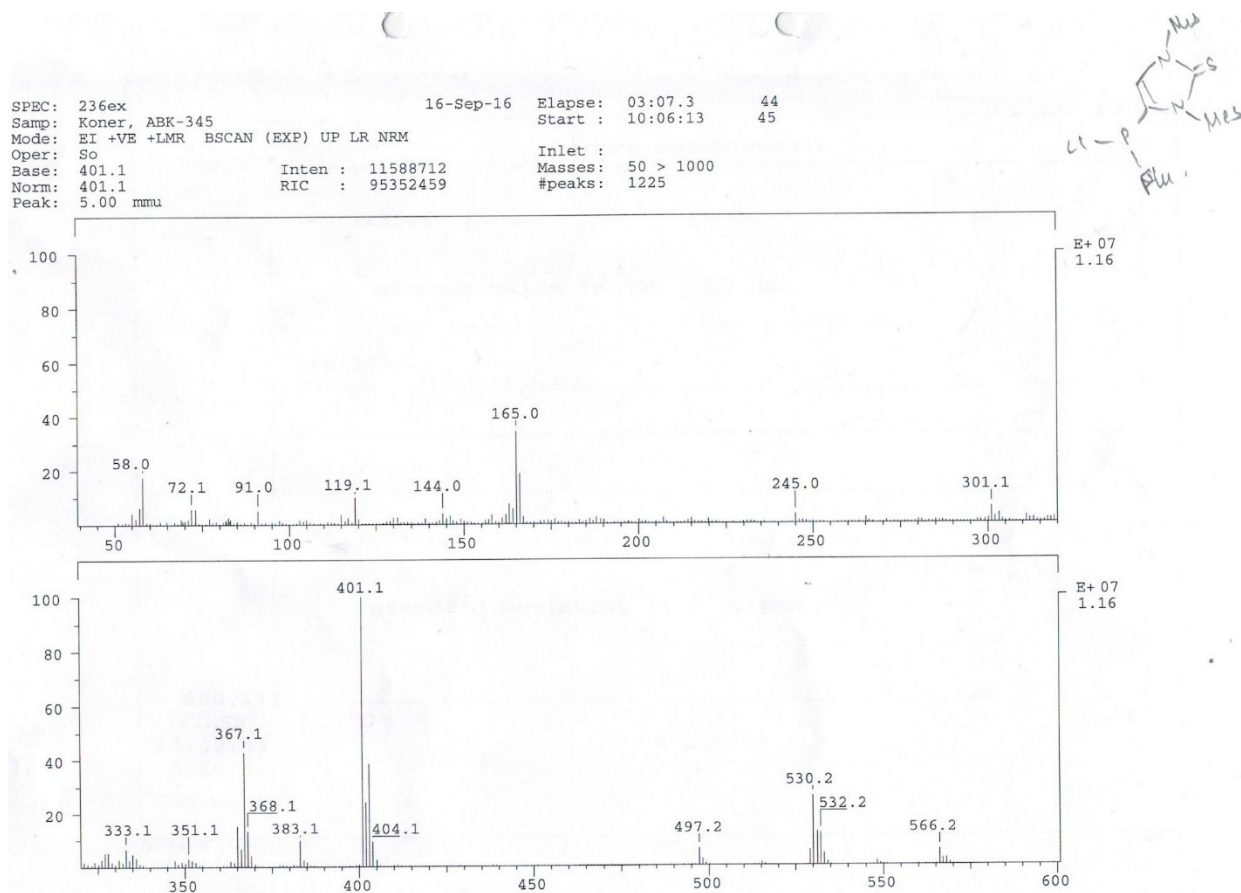

## 14 Spectra for Compound **8**.

Figure S53:  $^1\text{H}$  NMR spectrum of **8** in  $\text{CDCl}_3$  (300.1 MHz, 25 °C)

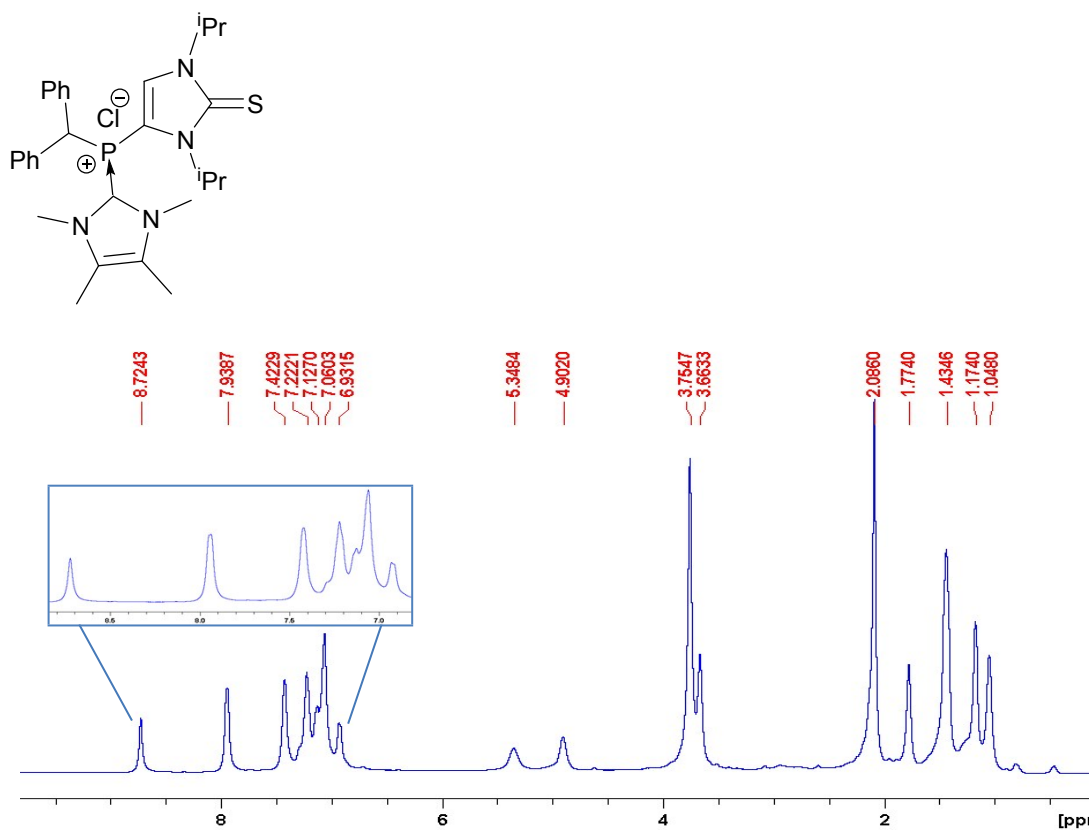

Figure S54:  $^{13}\text{C}$   $\{^1\text{H}\}$  NMR spectrum of **8** in  $\text{CDCl}_3$  (75.5 MHz, 25 °C)

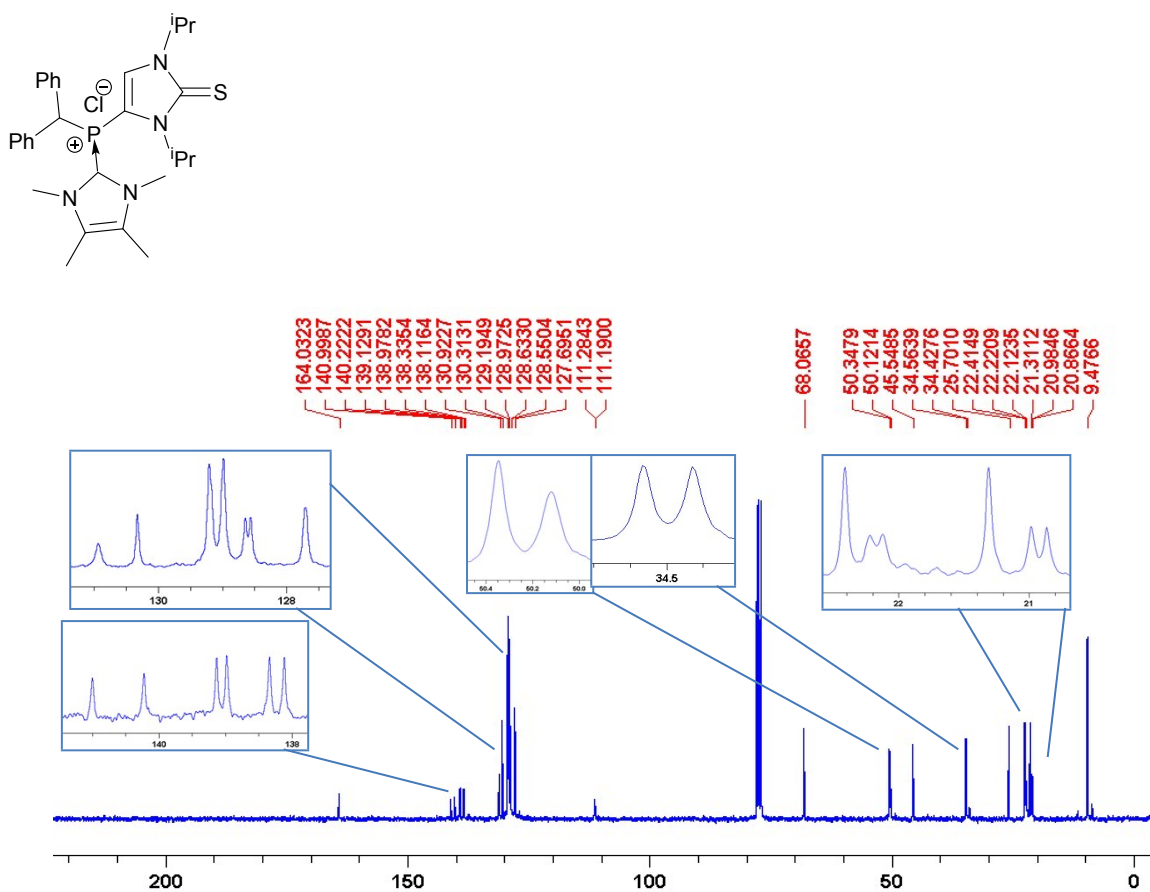

Figure S55:  $^{31}\text{P}$  NMR spectrum of **8** in  $\text{CDCl}_3$  (121.5 MHz, 25 °C)

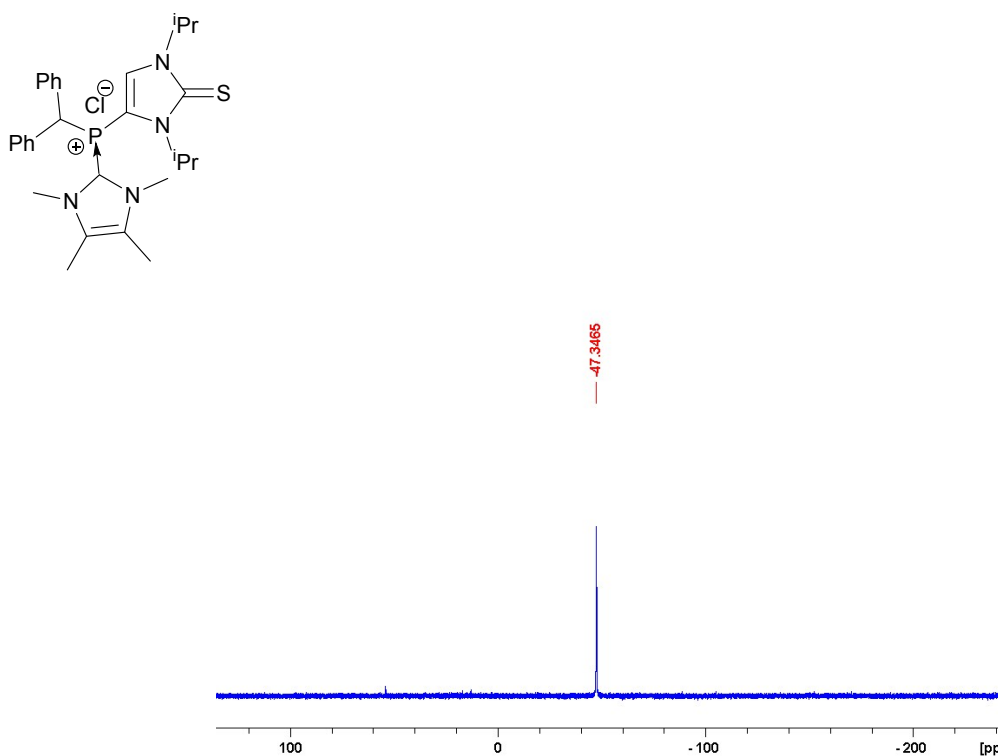

Figure 56: ESI-MS spectrum of **8**.

Sample Report (continued):

1: (Time: 1.30) Combine (49:71-(23:40+106:119))

1:MS ES+  
9.8e+006

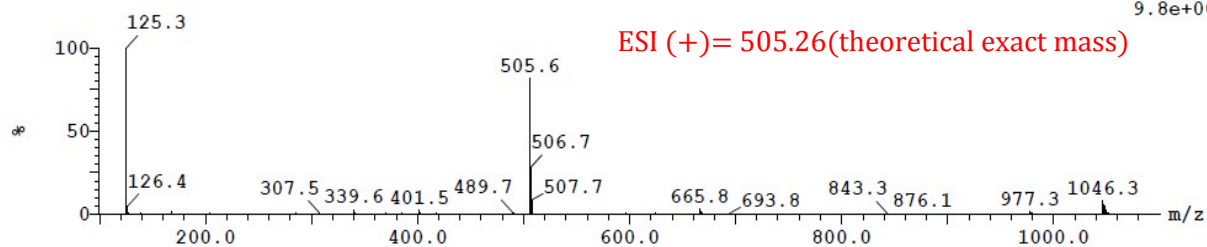

## 15 Spectra for Compound **11**.

Figure S57:  $^1\text{H}$  NMR spectrum of **11** in  $\text{CDCl}_3$  (300.1 MHz, 25 °C)

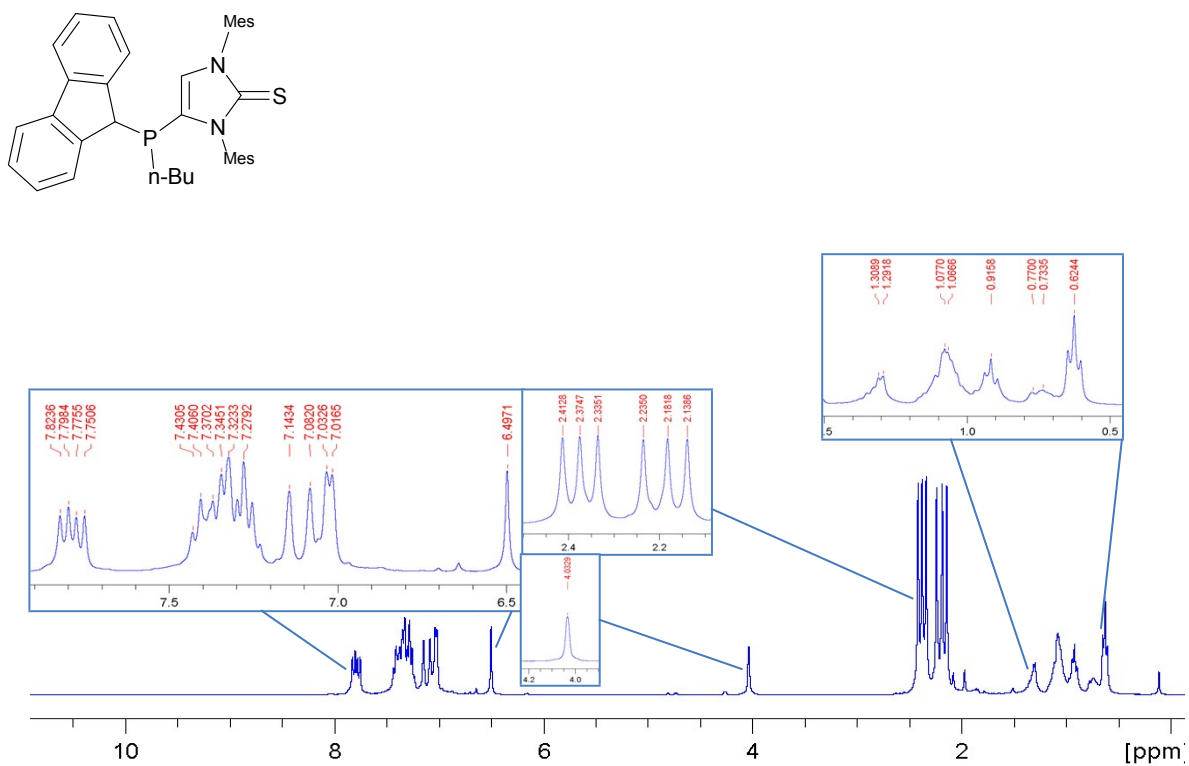

Figure S58:  $^{13}\text{C}$   $\{^1\text{H}\}$  NMR spectrum of **11** in  $\text{CDCl}_3$  (75.5 MHz, 25 °C)

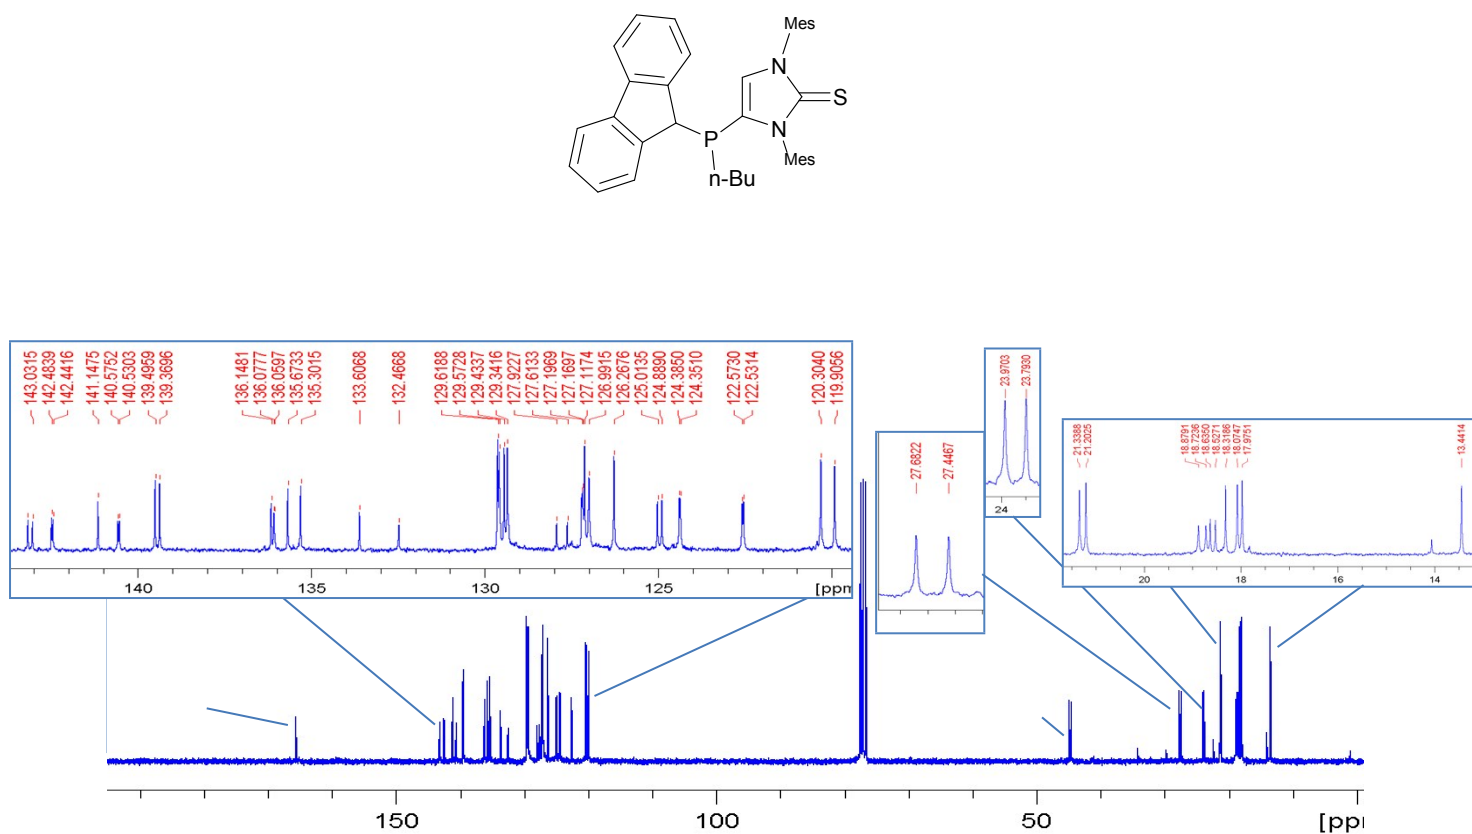

Figure S59:  $^{31}\text{P}$  NMR spectrum of **11** in  $\text{CDCl}_3$  (121.5 MHz, 25 °C)

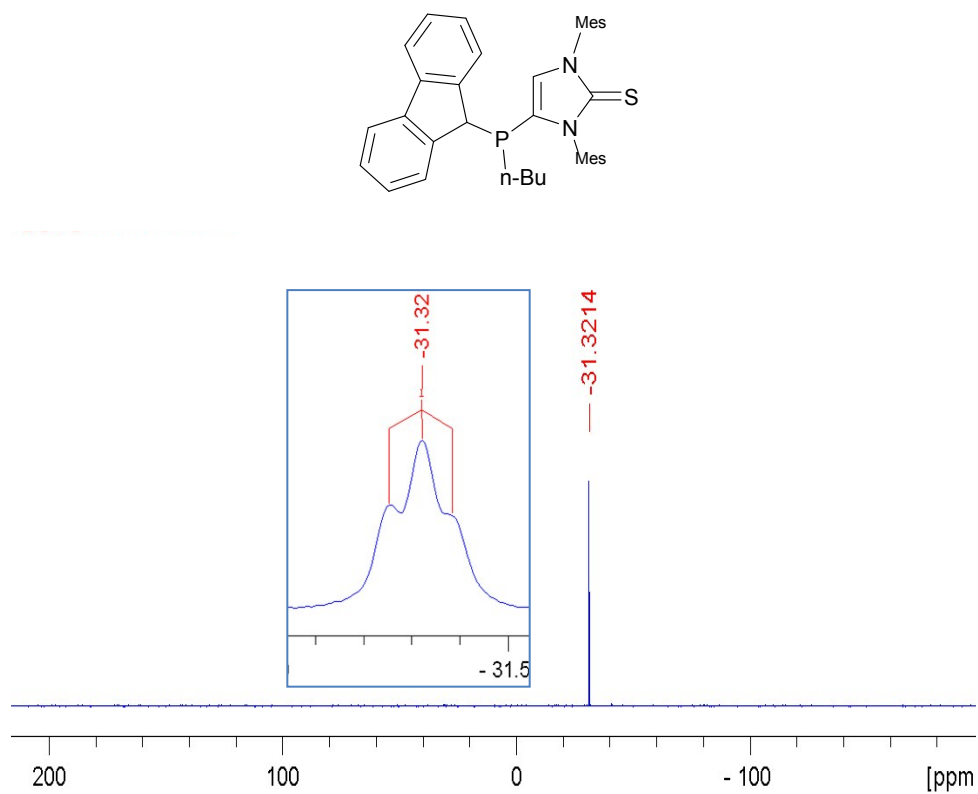

Figure 60: EI-MS spectrum of **11**.

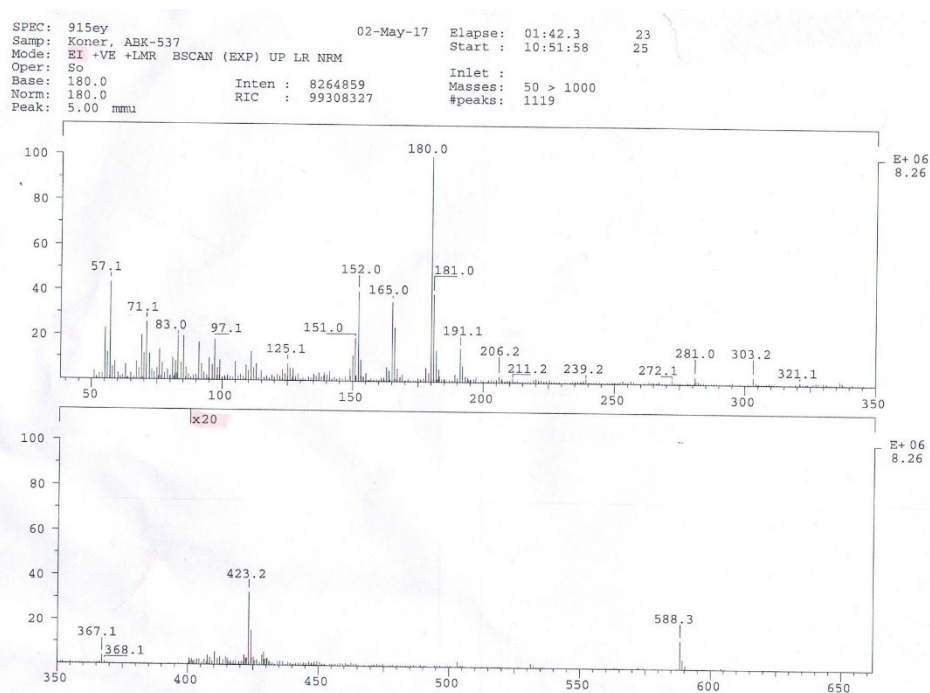

Figure 61: ESI-MS spectrum of **11**.

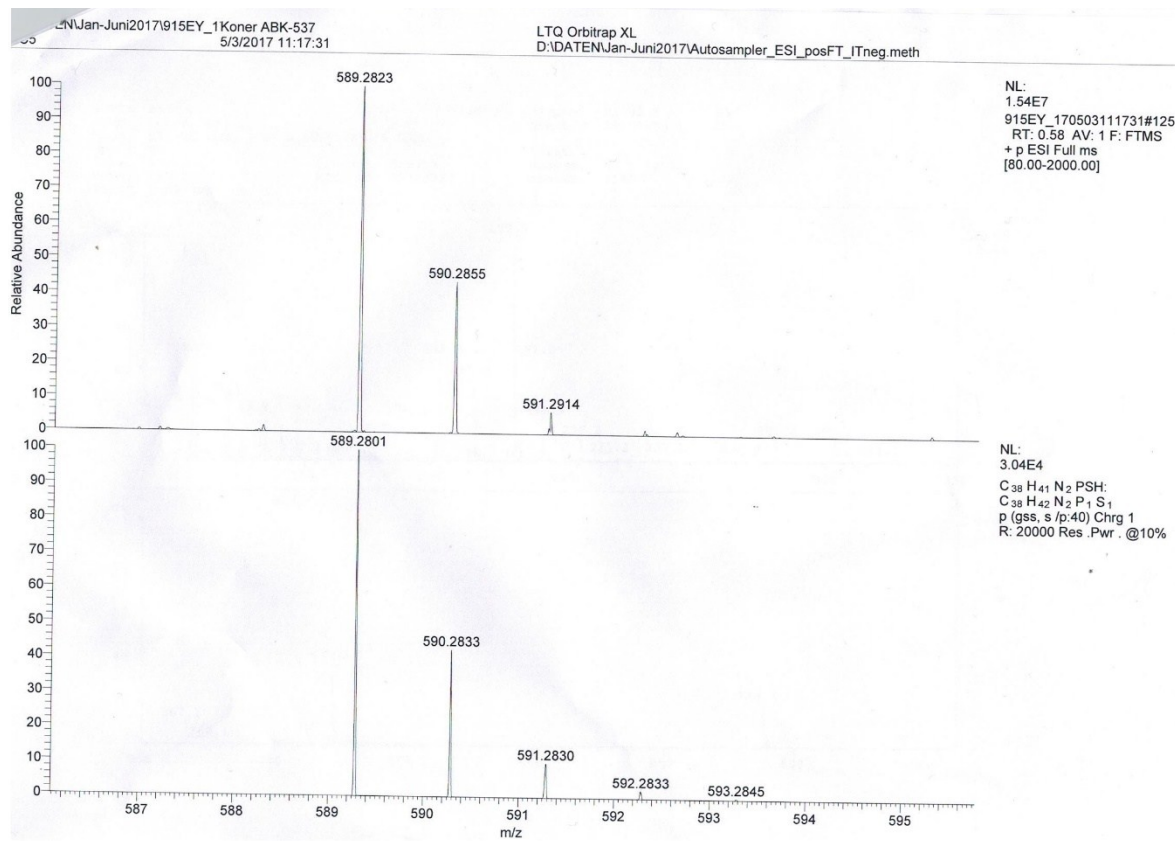

Supplement: c7dt01859b1.pdf [file c7dt01859b1.pdf]
